1     **Shallow Genome Sequencing for Phylogenomics of Mycorrhizal Fungi from**  
2                                    **Endangered Orchids**

3  
4     Sarah A. Unruh<sup>1</sup>, J. Chris Pires<sup>1</sup>, Lawrence Zettler<sup>2</sup>, Luigi Erba<sup>2</sup>, Igor Grigoriev<sup>3</sup>, Kerrie Barry<sup>3</sup>,  
5                                    Christopher Daum<sup>3</sup>, Anna Lipzen<sup>3</sup>, and Jason E. Stajich<sup>4</sup>

6  
7     1. Division of Biological Sciences, University of Missouri, Columbia, MO, United States

8  
9     Sarah Unruh Roles: Conceptualization, Data Curation, Formal Analysis, Funding Acquisition,  
10     Investigation, Project Administration, Resources, Visualization, Writing – Original Draft  
11     Preparation, Writing – Review and Editing

12  
13     J. Chris Pires Roles: Conceptualization, Funding Acquisition, Project Administration, Resources,  
14     Supervision, Writing – Review and Editing

15  
16     2. Department of Biology, Illinois College, Jacksonville, IL, United States

17  
18     Lawrence W. Zettler Roles: Funding acquisition, Resources

19  
20     Luigi Erba Roles: Investigation

21  
22     3. United States of America Department of Energy Joint Genome Institute, Walnut Creek, CA,  
23     United States

24  
25     Igor Grigoriev Roles: Project Administration, Resources

26  
27     Kerrie Barry Roles: Project Administration

28  
29     Christopher Daum: Resources

30  
31     Anna Lipzen: Investigation

32  
33     4. Microbiology and Plant Pathology, University of California-Riverside, Riverside, CA, United  
34     States

35  
36     Jason E. Stajich Roles: Data Curation, Formal analysis, Investigation, Methodology, Resources,  
37     Software, Visualization, Writing – Review and Editing

## ABSTRACT

41  
42  
43 Most plant species form symbioses with mycorrhizal fungi and this relationship is especially  
44 important for orchids. Fungi in the genera *Tulasnella*, *Ceratobasidium*, and *Serendipita* are  
45 critically important for orchid germination, growth and development. The goals of this study are  
46 to understand the phylogenetic relationships of mycorrhizal fungi and to improve the taxonomic  
47 resources for these groups. We identified 32 fungal isolates with the internal transcribed spacer  
48 region and used shallow genome sequencing to functionally annotate these isolates. We  
49 constructed phylogenetic trees from 408 orthologous nuclear genes for 50 taxa representing 14  
50 genera, 11 families, and five orders in Agaricomycotina. While confirming relationships among  
51 the orders Cantharellales, Sebaciales, and Auriculariales, our results suggest novel relationships  
52 between families in the Cantharellales. Consistent with previous studies, we found the genera  
53 *Ceratobasidium* and *Thanatephorus* of Ceratobasidiaceae to not be monophyletic. Within the  
54 monophyletic genus *Tulasnella*, we found strong phylogenetic signals that suggest a potentially  
55 new species and a revision of current species boundaries (e.g. *Tulasnella calospora*); however it  
56 is premature to make taxonomic revisions without further sampling and morphological  
57 descriptions. There is low resolution of *Serendipita* isolates collected . More sampling is needed  
58 from areas around the world before making evolutionary-informed changes in taxonomy. Our  
59 study adds value to an important living collection of fungi isolated from endangered orchid  
60 species, but also informs future investigations of the evolution of orchid mycorrhizal fungi.

61

62  
63

## INTRODUCTION

64 Fungi are more than mere decomposers, they form symbioses with every other group of  
65 organisms on Earth. Fungal interactions span the entire symbiotic spectrum, from parasitism to  
66 mutualism. Most intertwined with plants, may have even enabled development/existence of land  
67 plants (Lutzoni et al., 2018). As a result of this long-term association, fungi are essential  
68 symbionts to almost every plant species on Earth. The fungi live in plant roots are called  
69 mycorrhizal fungi and associate with more than 85% of plant species (Smith and Read, 2008).  
70 Mycorrhizal fungi are critical for plant health and function by helping obtain and retain water,  
71 mediating defense responses, participating in signaling between roots, and facilitating the  
72 exchange of nutrients like carbon, phosphorus, and nitrogen (Barto et al., 2012; Jung et al., 2012;  
73 Peterson and Massicotte, 2004; Wang et al., 2017; Yoder et al., 2010). The plant group that relies  
74 the most on their mycorrhizal fungi are orchids.

75 Orchids rely on their mycorrhizal symbionts to stimulate plant development during seed  
76 germination by providing carbon resources (Kuga et al., 2014). Orchid mycorrhizal fungi (ORM)  
77 form hyphal coils termed pelotons inside the cells of orchid embryos and in the adult roots,  
78 tubers, or rhizomes (McCormick et al., 2016; Rasmussen et al., 2015). These pelotons are the  
79 sites of nutrient exchange and the molecular nature of this marketplace remains poorly  
80 understood though exciting new research shedding light (Fochi et al., 2017a; Fochi et al., 2017b;  
81 Kuga et al., 2014). Most orchids associate with mycobionts belonging to the basidiomycete  
82 groups Sebaciniales, Ceratobasidiaceae and Tulasnellaceae. In addition to orchid mycorrhizal  
83 fungi, these groups contain saprotrophs, plant pathogens, and ectomycorrhizal representing a  
84 wide array of metabolic capabilities (Kohler et al., 2015; Nagy et al., 2016). Furthermore,  
85 molecular studies have revealed simultaneous root colonization by multiple fungal partners in

86 both photosynthetic terrestrial and epiphytic orchids (Martos et al., 2012). Concluding sentence  
87 that makes the argument that there are many dynamics we need to better understand so we need  
88 to characterize the diversity of these fungi to untangle their interactions and mechanisms.

89         Although fungi play critical roles, they are rarely visible on the landscape. The number of  
90 extant fungal species on Earth ranges from 2-5 million (Blackwell, 2011; Hawksworth and  
91 Lücking, 2017) up to 166 million species (Larsen et al., 2017). Most species are microscopic and  
92 over the last few decades species identification has relied on molecular methods. Historically,  
93 these methods often have used a single molecular marker such as ITS (Nilsson et al., 2014).  
94 However modern genome sequencing methods are important tools to discover and describe  
95 taxonomic, phylogenetic and functional diversity. The use of different, new analytical tools has  
96 also greatly benefited our knowledge of the below-ground ecology of orchids and orchid  
97 mycorrhizal fungi. On the right track with multiple markers and Bayesian species delimitations  
98 (Ruibal et al., 2014; Ruibal et al., 2013; Whitehead et al., 2017). New species of *Tulasnella* and  
99 relatives are constantly being identified (Linde et al., 2017). Continue to combine sequencing  
100 with taxonomic knowledge to provide a comprehensive description of the species that associate  
101 with orchids.

102         The genera of orchid fungi we have sampled belong to two orders, Cantharellales and  
103 Sebaciales, in the Agaricomycetes. Cantharellales is sister to the rest of class Agaricomycetes  
104 and comprises seven families total (Ceratobasidiaceae, Tulasnellaceae, Botryobasidiaceae,  
105 Cantharellaceae, Clavulinaceae, Hydnaceae, and Aphelariaceae), though Hibbett et al., (2014),  
106 define Cantharellaceae and Clavulinaceae as synonymous with Hydnaceae and the status of  
107 Aphelariaceae is unknown (Kirk et al., 2008; Leacock, 2018). Ceratobasidiaceae has two genera  
108 (*Ceratobasidium* and *Rhizoctonia/Thanatephorus*) that have been demonstrated to be



109 polyphyletic (Veldre et al., 2013). In fact, the type specimen for *Ceratobasidium* has since been  
110 reclassified as a member of the order Auriculariales based on the characters like the shape of the  
111 basidia and the dolipore (specialized hyphal septa) ultrastructure , leading Oberwinkler et al.,  
112 (2013a) to restrict *Ceratobasidium* and Ceratobasidiaceae to the type specimen and reclassifying  
113 *Ceratobasidium* spp. as *Rhizoctonia* (Kirk et al., 2008). Tulasnellaceae contains 3 genera and c.  
114 50 sp (Kirk et al., 2008). In addition to these described families, the genus *Sisotrema* is known to  
115 be polyphyletic with members in Auriculariales as well as Cantharellales. Successively sister to  
116 the rest of the Agaricomycetes is the order Sebacinales which includes two families – the  
117 Sebacinaceae and Serendipitaceae (Weiss et al., 2016). Though this order comprises a wide  
118 swath of diversity, it remains difficult to adequately describe species due to a high volume of  
119 environmental sequence data without information about morphological characters (Oberwinkler  
120 et al., 2013b; Weiss et al., 2016).

121         In this study, our primary goal is to shallowly sequence a rich living collection of fungi  
122 isolated from orchid roots and seedlings to provide a phylogenetic framework for future genome-  
123 enabled evolutionary and functional studies. Our secondary goal, with the addition of key  
124 outgroups, is to answer a series of nested phylogenetic questions about the relationships among  
125 the orders, families and genera of Agaricomycetes, with a focus on Ceratobasidiaceae,  
126 Tulasnellaceae, and Sebacinaceae. We screened taxa using ITS sequencing, and after  
127 contaminants were removed we chose 32 taxa for shallow genome sequencing. A total of 50 taxa  
128 were analyzed and we extracted 408 orthologous genes. Two highly-supported phylogenetic  
129 trees were constructed with RAxML and ASTRAL-III that were overall highly congruent. We  
130 discuss how our study provides new insight into the relationships of these orchid mycorrhizal  
131 fungi, highlights areas for taxonomic attention and we suggest future research directions.

132  
133  
134

## 2. MATERIALS AND METHODS

### 135 2.1 Taxonomic sampling

136 32 environmental samples were isolated from endangered orchids. These samples span  
137 three genera in three families in two orders. Outgroup genomes were chosen from the repository  
138 in MycoCosm to capture the breadth of taxonomic diversity (Grigoriev et al., 2014). Two super  
139 outgroups (*Kockovaella* sp and *Calocera* sp) were chosen from the successively sister classes  
140 outside the ingroup class Agaricomycetes [Tremellomycetes, [Dacrymycetes,  
141 [Agaricomycetes]]]. In the Cantharellales we sampled the three genomes in Ceratobasidiaceae  
142 (*Rhizoctonia solani*, *Thanatephorus cucumeris*, and *Ceratobasidium* sp AG1), the two genomes  
143 in Tulasnellaceae (*Tulasnella calospora* AL13/4D, and *Tulasnella calospora* UAMH9824), and  
144 one genome each from 4 of the remaining 5 families *Botryobasidium botryosum*  
145 (Botryobasidiaceae), *Clavulina* sp (Clavulinaceae), *Cantharellus anzutake* (Cantharellaceae), and  
146 *Hydnum rufescens* (Hydnaceae) . We also included three genomes in Serendipitaceae  
147 (Sebacinales) *Sebacina vermifera* (syn. *Serendipita vermifera*), *Piriformospora indica* (syn.  
148 *Serendipita indica*), and *Serendipita* sp. 407. We sampled representatives from the order  
149 Auriculariales to capture the entire diversity of these sequences (*Oliveonia pauxilla*, *Auricularia*  
150 *subglabra*, *Aporpium caryae*, and *Exidia glandulosa*).

### 151 2.2 Fungal Isolates

152 The 32 fungal samples used in this study were isolated from roots or protocorms (the  
153 seedling stage) of endangered orchid species in areas spanning from Hawaii to Florida, with a  
154 focus on the Midwest and the Florida Panther National Wildlife Refuge (Table 1). For the full  
155 description of the isolation techniques used, see Zettler and Corey (2018). Briefly, root tissue

156 was surface-sterilized then placed in a petri dish with sterile water and finely diced with a  
157 scalpel. Fungal Isolation Media (Clements et al., 1986) was poured on the diced root tissue and  
158 left at ambient temperature. After 24-48 hours, the plates were examined with a dissecting  
159 microscope to identify fungal growth. Mycelia were excised and placed on Difco Potato  
160 Dextrose Agar (PDA; Becton Dickinson and Co., Sparks, MD, Mfr # BD 213400). Those fungi  
161 with morphological characteristics consistent with fungi in the form genus *Rhizoctonia* as  
162 identified in Currah et al., (1997) were retained for identification with ITS sequencing (Figure  
163 1).

164 Fungi were grown in flasks with 75ml of full strength Difco Potato Dextrose Broth  
165 (Difco Becton Dickinson and Co., Sparks, MD, Mfr # BD 254920) on a shaker table until there  
166 was enough tissue for extraction. Depending on the isolate this took 2-6 weeks. Often multiple  
167 flasks of each isolate were grown at one time to speed up this process. For extraction, the entire  
168 contents of each flask was poured into a 150mL Polystyrene Bottle Top Filter 0.45um (Corning  
169 Incorporated, Corning, USA, Cat # 430627) and washed with DI water. These samples were  
170 weighed to determine how many samples could be processed from each sample (minimum of 0.2  
171 grams filtered weight/tube). Fungi were isolated with either the Bacterial/Fungal DNA extraction  
172 kit (Zymo Research, Irvine, USA, Cat # D6005, Lot # ZRC201856) according to manufacturer  
173 protocol or a CTAB, phenol chloroform isoamyl procedure (Supplemental Figure S1). When the  
174 Zymo kit was used, fungi were added to lysis tubes and put on bead beater for two rounds of four  
175 minutes. If the CTAB extraction was employed, fungal tissue was ground with liquid Nitrogen in  
176 ceramic mortar and pestle. Extracted DNA was assayed on a NanoDrop 2000 (ThermoFisher  
177 Scientific, USA, cat # ND-2000) and on a Qubit 2.0 Fluorometer (ThermoFisher Scientific,  
178 USA, cat # Q32866) with the Qubit double-stranded DNA High Sensitivity Assay kit

179 (ThermoFisher Scientific, USA, cat # Q32851). We followed JGI instruction for sample  
180 submission by submitting approximately 500 ng of each sample in a total volume of 25-35 uL in  
181 one 96-well plate provided by JGI.

### 182 **2.3 ITS sequencing for Species Identification**

183 To determine species identity, we sequenced the internal transcribed spacer (ITS) region  
184 of the rDNA. We used the same DNA extraction methods referenced above. We used the primer  
185 pairs ITS1/ITS4-Tul or ITS1-OF/ITS4-OF for isolates presumed to be *Tulasnella* as the ITS  
186 sequences in this genus are highly divergent and not captured well with other primers (Taylor  
187 and McCormick, 2008). For the genera *Ceratobasidium* and *Serendipita*, the general primers  
188 ITS1/ITS4 or ITS1-OF/ITS4-OF were used and if these did not successfully amplify the ITS  
189 region of *Serendipita* isolates the primer pair ITS3Seb/NL4 (Bellemain et al., 2010; Ray et al.,  
190 2015; White et al., 1990). The amplified DNA was cleaned with the DNA Clean and  
191 Concentrator-25 kit (Zymo Research, Irvine, USA, cat # D4033). These PCR products were  
192 assessed on a 1.5% agarose gel and Sanger sequencing was performed at the University of  
193 Missouri DNA Core Facility. These sequences were evaluated for confidence in base calling and  
194 edited by trimming low quality bases from the beginning and end of each sequence in Geneious  
195 9.1.8 (<http://www.geneious.com/>). These trimmed sequences were queried against NCBI's  
196 default nucleotide-nucleotide database as well as the UNITE database for species identification  
197 (Nilsson et al., 2019). These sequences were generated for the purpose of accurate species ID  
198 before sending DNA samples for shallow genome sequencing.

### 199 200 **2.4 Shallow Genome Sequencing and Quality Control**

201 Shallow genome sequencing of 32 samples, quality control, and filtering were performed  
202 at the Joint Genome Institute (JGI) under a Community Sequencing Proposal (#2000). Samples

203 were run on an Illumina NovaSeq with 2x151 base pair (bp) reads. The quality control and  
204 filtering at the JGI use BBmap to remove contamination and remove low quality reads (Bushnell  
205 B., BBMap. <http://sourceforge.net/projects/bbmap/>). Three samples were sequenced at the  
206 University of Missouri's DNA Core Facility which were run on an Illumina NextSeq 500  
207 machine on one lane with 45 other samples generating 2x150 bp reads.

## 208 **2.5 Shallow Genome Assembly and Annotation**

209 All cleaned and filtered sequences from the Joint Genome Institute and the University of  
210 Missouri were assembled with the AAFTF pipeline for read assembly, remove vector  
211 contamination and duplicate contigs, contig sequence polishing and sorting the contigs by length  
212 (Stajich, JE., Automatic Assembly For the Fungi. <https://github.com/stajichlab/AAFTF>). The  
213 pipeline performs assembly with Spades 3.10.0 using default parameters which consider 3 kmer  
214 values and select the optimal assembly based on summary statistics (Nurk et al., 2013). As a  
215 measure to assess genome completeness, all samples were run through BUSCO 3.0.2 using the  
216 Basidiomycota database (Simao et al., 2015). For most samples, RNA sequence data was used to  
217 facilitate annotation. When samples were too distantly related to map efficiently to the RNA  
218 sequencing reads, these taxa were annotated without aligning to the RNA sequences (Table 5).  
219 The RNA sequences used for reference were also generated from JGI CSP #2000 and will be  
220 published as part of a separate study.

221 All samples were then prepared for gene prediction using Funannotate 1.6.0 (Palmer JP,  
222 Stajich JE. 2018, <https://github.com/nextgenusfs/funannotate>), which performs all the steps  
223 necessary for genome annotation from gene prediction training to final gene consensus model,  
224 functional prediction, and dataset preparation for deposition into GenBank. The tool first runs  
225 RepeatMasker 4.0.7 (<http://www.repeatmasker.org>). This “softmasks” the genome by converting

226 repetitive elements into lowercase letters in the assembly files. This step is necessary for the gene  
227 prediction steps that follow. After masking, each assembly is run through a training step to  
228 provide the initial models for the *ab initio* gene prediction programs AUGUSTUS 3.3.0 (Keller  
229 et al., 2011; Stanke and Waack, 2003), SNAP (Korf, 2004), CodingQuarry (Testa et al.,  
230 2015), and GeneMark-ES/ET 4.38.0 (Lomsadze et al., 2014). Protein sequences are also aligned  
231 with diamond (Buchfink et al., 2015) and gene models polished with exonerate (Slater and  
232 Birney, 2005). When RNASeq reads were available for a strain, these were applied as part of a  
233 training step which first aligned short RNASeq reads, followed by assembly of these reads into  
234 contig with Trinity. Finally these assembled transcripts were aligned to the genome to produce  
235 gene models which were used for gene predictor training. Table 5 has the strains which were  
236 able to use the RNASeq data as support for gene model training and prediction. These combined  
237 evidence of these gene predictions, both *ab initio* and protein and transcript sequence based,  
238 were combined with EvidenceModeler to use combined evidence to predict a final set of protein  
239 coding genes. In addition tRNA gene predictions were performed with tRNAScan-SE (Lowe and  
240 Eddy, 1997). The resulting predicted protein files were then used for the phylogenetic analyses.

## 241 **2.6 Phylogenomic analysis**

242 We used the pipeline PHYling 1.0 (<https://doi.org/10.5281/zenodo.1257001>) developed  
243 by the Stajich lab, to extract orthologous genes from the predicted proteins of our taxa (Spatafora  
244 et al., 2016). PHYling uses Hmmer3 (v3.2.1) to compare our predicted proteins to a list of  
245 Profile-Hidden-Markov models of phylogenetically informative markers. The list we used is the  
246 434 orthologous gene set (<https://doi.org/10.5281/zenodo.1251476>) constructed by the 1000  
247 Fungal Genomes Project and identified as single-copy in orthologous gene clusters available  
248 from the Joint Genome Institute's MycoCosm repository (Grigoriev et al., 2014). We used

249 hmmsearch to compare each sample's proteome to the 434 gene list. The protein sequence  
250 homologs we identified were aligned to the marker-profile HMM with hmalign. These  
251 alignments were concatenated to run a phylogenetic analysis with RAxML 8.2.12 (Stamatakis,  
252 2006; Stamatakis et al., 2008). The model of evolution was determined automatically and  
253 bootstrapped with 100 replicates. The gene trees generated from RAxML were used to construct  
254 a consensus tree with ASTRAL-III 5.6.3 (Mirarab et al., 2014; Zhang et al., 2017).

## 255 **2.7 Data accessibility**

256 Isolates with UAMH numbers are stored in the UAMH Centre for Global Microfungal  
257 Biodiversity repository. Raw DNA sequence data have been deposited in SRA and are associated  
258 with BioProjects listed in Table 3. Scripts used for these analyses and all alignments, trees, and  
259 intermediate files will be made available in a Dryad repository upon publication. BioProject IDs  
260 and JGI Mycocosm repositories are summarized in Table 3.

261

262

## 3. RESULTS

263

### 3.1 ITS identifications

264 For the 35 isolates studied, ITS identifications, primers used and the length of each  
265 sequence are summarized in Table 2. One sample sent to the Joint Genome Institute was not  
266 sequenced due to poor DNA quality. Two isolates were identified as contaminants (isolates 420  
267 and 422) and were excluded from further analysis (Table 2). Only four out of 35 isolates were  
268 identified to species.

### 269 3.2 Shallow genome sequencing and annotation

270 Shallow genome sequencing of 32 fungal isolates resulted in a wide range in the number  
271 of genes annotated in each individual genome. The isolate *Serendipita sp* 396 has the least  
272 number of annotated genes at 8,285 and *Ceratobasidium sp* 428 has the most at 25,099. The

273 BUSCO completeness scores ranged from 54.2% to 96.6% of the 1335 orthologues in the  
274 BUSCO dataset. For assembly statistics see Table 4 and for BUSCO completeness scores see  
275 Table 5. Out of 435 orthologous genes, 429 had enough significant hits for further analysis. The  
276 number of genes present for each taxa ranged from 299 in *Tulasnella sp* 408 to 425 in the  
277 outgroups *Auricularia subglabra* and *Botryobasidium botryosum*. For full matrix occupancy see  
278 Table 6. The outgroup *Kockovaella imperatae* contained 408 of the 429 genes so those 408  
279 sequences were included in the phylogenetic analyses. The concatenated alignment has 128,774  
280 distinct alignment patterns and is 14.31% gaps.

### 281 **3.3 Phylogenetic analysis**

282 The best concatenated tree likelihood is -3406977.36. The bootstrap (BS) support is  
283 overall very high with the majority of branches at 100 (Figure 2). Eight branches have bootstrap  
284 values below 100, and, of those, only three are below 75. The ASTRAL-III tree shows high  
285 congruence with the concatenated tree and all but five branches are supported with 0.7 local  
286 posterior probability or higher (Figure 3). The two phylogenies have the exact same topology on  
287 the class, order, and family level and recapitulate with high support previously published  
288 relationships between orders in the Agaricomycetes [Cantharellales, [Sebacinales,  
289 [Auriculariales]]]. The phylogenies are highly congruent within Cantharellales, however, the  
290 relationships between *Serendipita* isolates are quite different as discussed below.

291 Within the Cantharellales, we have strong support (94 BS, 0.99 posterior probability) for  
292 Ceratobasidiaceae as sister to the rest of the order. Within Ceratobasidiaceae, the *Ceratobasidium*  
293 isolates cluster together with very strong support with the exception of *Ceratobasidium sp* 423,  
294 which is nested within *Rhizoctonia solani* and *Thanatephorus cucumeris*. The only difference  
295 between the ML and ASTRAL-III in the family is the placement of *Ceratobasidium sp* 370. In



296 the ML tree, 370 is sister to a clade of [414, [394+UAMH11750]] and in the ASTRAL-III tree,  
297 370 is sister with isolate 414 and equally related to 394+UAMH11750. There is no phylogenetic  
298 signal based on orchid source, geographic location (Figure 3, Table 1). Both trees show  
299 Tulasnellaceae as sister to the clade [Botryobasidium, [Clavulina, [Cantherellus + Hydnum]]]  
300 with 100BS and 1.0 pp. The relationships in *Tulasnella* are highly supported with all but one  
301 branch with 100 BS values and all but two branches with pps less than 1.0. Notably, the genome  
302 sequence and the shallow genome sequence data for *Tulasnella calospora* UAMH 9824 are sister  
303 to each other in the tree, though two other isolates are included in a clade with *Tulasnella*  
304 *calospora* AL13.

305 The samples in the Sebaciniales are not as well-resolved. The *Serendipita* isolates have the  
306 least support overall due to the short branches of all isolates aside from *Serendipita* 399, which is  
307 sister to the rest. All *Serendipita* spp in this study are most closely related to *Serendipita*  
308 (= *Piriformospora*) *indica* with 100 BS/1.0. It is important to note our inclusion of the reference  
309 genome *Serendipita* 407 (*Serendipita* sp.\_407\_v1.0) and a shallow genome sequence of the same  
310 isolate (*Serendipita*\_sp\_407.Orchid). In our dataset these two samples are not sister to each other.  
311 In the quartet-based ASTRAL-III tree, *Serendipita* 400 and 411 are sister to each other with 0.77  
312 posterior probability, whereas in the concatenated tree, the genome of isolate 407 was sister to  
313 the rest of the *Serendipita* isolates aside from 399. The short branches in this group indicate a  
314 small number of changes in the alignment in the ML tree and a high degree of discordance in the  
315 ASTRAL-III tree. All of the *Serendipita* isolates are from epiphytic orchids in the Florida  
316 Panther National Wildlife Refuge (Figure 3, Table 1). In the ASTRAL tree, *Serendipita* spp tend  
317 to cluster with orchid source compared to the ML tree.

318

319

## 4. DISCUSSION

### 4.1 Overview

321           The primary goal of this study was to use shallow genome sequencing and phylogenetic  
322 methods to uncover the evolutionary relationships in a collection of fungal isolates that interact  
323 with endangered orchid species. The secondary goal was to leverage current genomic resources  
324 to investigate relationships among the orders, families and genera of Agaricomycetes, with a  
325 focus on Ceratobasidiales, Tulasnellaceae, and Sebaciniales. Understanding of species in the  
326 fungal genera that facilitate orchid germination is extremely poor, as the number of formally  
327 described species is much lower than the diversity of fungi revealed from metagenomic or  
328 environmental sequencing. The results of this study add to our understanding of the genetic  
329 diversity of these fungal taxa and provide an example of how sequence data can be incorporated  
330 with taxonomic expertise to better describe fungal species.

331           The fungi that help germinate orchids were first categorized under one “form genus”  
332 called *Rhizoctonia* (Currah et al., 1997). This classification is not phylogenetically informative  
333 and today we know many orchid symbionts come from two orders (Cantharellales and  
334 Sebaciales) in the class Agaricomycetes (Hibbett, 2006). However, the taxonomy remains to be  
335 fully resolved. One reason classification can be difficult in these taxa is that these isolates do not  
336 sporulate or make sexual structures in laboratory conditions. Another is that traditionally, fungi  
337 were classified under two different names – the sexual stage (teleomorph) or vegetative state  
338 (anamorph). This policy ended during the 2011 International Botanical Congress when the  
339 Nomenclature Section voted to eliminate this dual nomenclature system (Hibbett and Taylor,  
340 2013). Many of the names published in literature are no longer considered the correct taxonomy  
341 though in many cases these changes are not strongly reinforced. This study examines the

342 phylogenetic relationships of a collection of isolates so that the genetic distance of these strains  
343 is known and to provide a framework for future evolutionary questions. Data from these  
344 phylogenies can also provide evidence for new species or to revise current species concepts.  
345 Understanding of taxonomy and species relationships is critical for testing evolutionary  
346 hypotheses. Increased sampling within taxonomic groups and from sites around the globe is  
347 necessary for future studies.

348

#### 349 **4.2 Relationships among Orders and Families**

350 We used shallow genome sequencing for phylogenomics to describe the evolutionary  
351 relationships among a collection of orchid mycorrhizal fungi. We also included numerous  
352 outgroups to span the amount of biodiversity represented by these fungi. The large number of  
353 coding genes allowed us to provide strong evidence for relationships between orders and a novel  
354 result within the families of Cantharellales. Our results show strong support for the relationships  
355 [Cantharellales, [Sebacinales, [Auriculariales]]]. This is consistent with previously reported  
356 studies (Nagy et al., 2016). Within Cantharellales, the taxonomy is less certain and is still  
357 undergoing changes. For example, Dictionary of the Fungi lists seven families while Hibbett et  
358 al., (2014) claim four by defining Clavulinaceae and Cantharellaceae as synonymous with  
359 Hydnaceae. This decision seems to be based on the authors' interpretations as the data in the  
360 papers they cite don't support this conclusion (Leacock 2018). González et al., (2016), found  
361 some support for the relationships [Tulasnellaceae, [Ceratobasidiaceae +Botryobasidiaceae,  
362 [Hydnaceae]]] based on the markers ITS-LSU, rpb2, tef1, and atp6. They did state that multiple  
363 coding genes would be necessary to see if their result was robust (González et al., 2016). Our  
364 results show strong support (99 BS and .94 posterior probability) for Ceratobasidiaceae as the

365 sister family to [Tulasnellaceae, [Botryobasidiaceae + rest of Cantharellales]]. We did only  
366 include one sample from the four groups besides Ceratobasidiaceae and Tulasnellaceae so more  
367 sampling is needed in this group of fungi to produce a robust and consistent phylogenetic  
368 inference.

### 369 **4.3 Relationships in Ceratobasidiaceae**

370 The *Ceratobasidium* samples are closely related with the exception of isolate  
371 *Ceratobasidium* sp 423 that is nested within *Rhizoctonia solani* and *Thanatephorus cucumeris*  
372 (Figures 2, 3). These results are consistent with Veldre et al., (2013), who found that the genera  
373 *Ceratobasidium* and *Thanatephorus* are polyphyletic. Given the type specimen for  
374 *Ceratobasidium* has since been placed in the Auriculariales, Oberwinkler et al., (2013a)  
375 recommended *Ceratobasidium* should be renamed *Rhizoctonia*. Given these taxonomic  
376 conundrums, attention is needed to make a robust classification system. Something we found  
377 affirming was the close relationship of isolates *Ceratobasidium* 11750 and *Ceratobasidium* 394.  
378 Based on a nearly identical ITS sequence alignment, these isolates were assumed to be very  
379 closely related. This result is noteworthy because they have differential abilities to germinate  
380 seeds from the endangered Ghost orchid, *Dendrophylax lindenii*. 394 can germinate seeds but  
381 379 does not. More sampling is needed to compare how the isolates included in our study are  
382 related to other *Ceratobasidium* spp. that are in defined Anastomosis Groups.

383

### 384 **4.4 Relationships in Tulasnellaceae**

385 Our *Tulasnella* isolates show a well-supported monophyletic clade in both phylogenetic  
386 trees (Figures 2 and 3). Without further targeted sampling, it is premature to delimit species  
387 boundaries; however, one species that could use revision is *Tulasnella calospora*. In both the

388 concatenated and coalescent phylogenies, the two *T. calospora* genomes are not sister to each  
389 other but include the isolates 408 and 417, which were not identified as *T. calospora* based on  
390 the ITS sequence. This result could be a function of the relatively low number of orthologous  
391 genes that we recovered from 408 and 417, 291 and 330 out of 434, respectively (Tables 5 and  
392 6). However, others have voiced concern over the species concept (Melissa McCormick, pers.  
393 comm.).

394 Three isolates in this analysis are from the Hawaiian island of Molokai (330, 331, and  
395 332; Table 1). These isolates cluster very closely in both phylogenies and are sister to three  
396 isolates of *Tulasnella inquilina*. These isolates turn pink when exposed to light and have highly  
397 divergent ITS sequences from the other *Tulasnella* isolates in this analysis. The strong support  
398 for the monophyly of these Hawaiian samples, and their placement in the tree, suggest a  
399 potentially new species. With increased sampling, more robust methods to delineate species  
400 boundaries such as those used in (Whitehead et al., 2017) and we will have the power to better  
401 describe the diversity of orchid mycorrhizal fungi.

#### 402 **4.5 Relationships in Sebacinales**

403 All of the *Serendipita* isolates in this analysis are from the Florida National Wildlife  
404 Panther Refuge (NWPR) in Florida and they are associated with three different epiphytic orchid  
405 species (Table 1). In both phylogenetic analyses, *Serendipita* 399 is sister to the rest of our  
406 samples. Growing on PDA, 399 looks morphologically distinct from the other *Serendipita sp* due  
407 to a darker orange pigment and a crustose layer on the surface of the agar. This isolate also  
408 grows much more slowly than other *Serendipita* taxa, it would take longer than four weeks for  
409 the fungus to grow to the edge of a standard petri dish. For the remaining samples, it could be,  
410 that there is one main species or population of *Serendipita* that grows in orchid roots in the

411 NWPR as their relationships are poorly resolved in the RAxML phylogeny and highly  
412 incongruent between the two phylogenies. However, in the ASTRAL analysis, the *Serendipita*  
413 isolates cluster somewhat closely by the orchid species from which they were isolated though  
414 this is not a strong signal (Figure 3). A more thorough and targeted analysis is required to  
415 determine the number of distinct populations of these fungi in the Florida National Panther  
416 Wildlife Refuge similar to that conducted by Ruibal et al., (2017) to describe the population  
417 structure of *Tulasnella prima* in Australia. It would be interesting to survey the fungi growing in  
418 the roots of all plant species in the NWPR to determine the genetic diversity of *Serendipita*  
419 across the landscape. Such an experiment would show whether orchids are using a narrow  
420 distribution of fungi or if the plants are less discerning but the genetic diversity of the fungi is  
421 simply very low.

422         Another result from our analysis shows that these fungal strains are most closely related  
423 to *Piriformospora indica*, a known ectomycorrhizal fungus species (Varma et al., 2001). Many  
424 fungi in the order Sebaciales are ecologically characterized as ectomycorrhizal fungi and  
425 interact with a wide diversity of plant species (Kohler et al., 2015). Indeed, researchers are  
426 isolating fungi in the Sebaciales from plants like switchgrass (*Panicum virgatum*) to determine  
427 the benefit of these fungi for applications in agriculture (Craven and Ray, 2019). Orchids might  
428 contribute to this effort, as it took more than one year for the Craven lab to isolate one strain of  
429 *Sebacina vermifera* ssp. *bescii* from switchgrass; similar fungi are much more easy to isolate  
430 from orchid roots (Prasun Ray, pers. comm.). Orchids could be environmental filters for fungi  
431 that could be beneficial in many plant-fungal interactions.

432

#### 433 **4.6 Future directions**

434           The next steps stemming from this study are to combine the phylogenetic relationships  
435 with taxonomic expertise to name new species or to revisit problematic species concepts like  
436 *Tulasnella calospora*. Additionally, it would be beneficial to sequence the genome of the type  
437 specimens for many of these genera and species. Being able to compare the genetic sequences of  
438 the type specimens would be extremely beneficial for fungal species that do not present sexual  
439 characteristics in the lab. A set of fifteen isolates from the collection have been sequenced on the  
440 PacBio platform and will be assembled into reference genomes as part of another aim of the  
441 Community Sequencing Proposal (Table 3).

442

443

#### **ACKNOWLEDGEMENTS**

444

445 I thank the Zettler lab students who worked in the field and the lab to isolate these beautiful  
446 fungi. We are grateful to the teams of Dr. Greg Bonito, Dr. Daniel Lindner, and Dr. Francis  
447 Martin including the ‘Mycorrhizal Genomics Initiative’ consortium and the 1KFG project for  
448 access to unpublished genome data. The genome sequence data were produced by the US  
449 Department of Energy Joint Genome Institute in collaboration with the user community. The  
450 work conducted by the U.S. Department of Energy Joint Genome Institute, a DOE Office of  
451 Science User Facility, is supported by the Office of Science of the U.S. Department of Energy  
452 under Contract No. DE-AC02-05CH11231. Computations were performed using the computer  
453 clusters and data storage resources of the University of California-Riverside HPCC, which were  
454 funded by grants from NSF (MRI-1429826) and NIH (1S10OD016290-01A1). Funding for this  
455 work is from Joint Genome Institute Community Sequencing Proposal (JGI CSP 2000), National

456 Science Foundation, IOS 1339156, and the Department of Energy (DOE), Defense Threat

457 Reduction Agency (DTRA).

458

459



## LITERATURE CITED

- 460  
461  
462 Barto, E.K., Weidenhamer, J.D., Cipollini, D., Rillig, M.C., 2012. Fungal superhighways: do  
463 common mycorrhizal networks enhance below ground communication? *Trends in Plant*  
464 *Science* 17, 633-637.
- 465 Bellemain, E., Carlsen, T., Brochmann, C., Coissac, E., Taberlet, P., Kauserud, H., 2010. ITS as  
466 an environmental DNA barcode for fungi: an in silico approach reveals potential PCR  
467 biases. *BMC microbiology* 10, 189.
- 468 Blackwell, M., 2011. The Fungi: 1, 2, 3 ... 5.1 million species? *American Journal of Botany* 98,  
469 426-438.
- 470 Buchfink, B., Xie, C., Huson, D.H., 2015. Fast and sensitive protein alignment using  
471 DIAMOND. *Nature Methods* 12, 59-60.
- 472 Bushnell, B., 2014. BBmap.
- 473 Clements, M., Muir, H., Cribb, P., 1986. A preliminary report on the symbiotic germination of  
474 European terrestrial orchids. *Kew Bulletin*, 437-445.
- 475 Craven, K.D., Ray, P., 2019. More than Serendipity: The Potential to Manage Soil Carbon and  
476 Emissions While Promoting Low-Input Agriculture with Serendipitoid Mycorrhizae.  
477 *Phytobiomes Journal* 3, 161-164.
- 478 Currah, R., Zelmer, C., Hambleton, S., Richardson, K., 1997. Fungi from orchid mycorrhizas.  
479 *Orchid Biology*. Springer, pp. 117-170.
- 480 Fochi, V., Chitarra, W., Kohler, A., Voyron, S., Singan, V.R., Lindquist, E.A., Barry, K.W.,  
481 Girlanda, M., Grigoriev, I.V., Martin, F., Balestrini, R., Perotto, S., 2017a. Fungal and  
482 plant gene expression in the *Tulasnella calospora*-*Serapias vomeracea* symbiosis provides  
483 clues about nitrogen pathways in orchid mycorrhizas. *New Phytol* 213, 365-379.
- 484 Fochi, V., Falla, N., Girlanda, M., Perotto, S., Balestrini, R., 2017b. Cell-specific expression of  
485 plant nutrient transporter genes in orchid mycorrhizae. *Plant Sci* 263, 39-45.
- 486 González, D., Rodríguez-Carres, M., Boekhout, T., Stalpers, J., Kuramae, E.E., Nakatani, A.K.,  
487 Vilgalys, R., Cubeta, M.A., 2016. Phylogenetic relationships of Rhizoctonia fungi within  
488 the Cantharellales. *Fungal Biol* 120, 603-619.
- 489 Grigoriev, I.V., Nikitin, R., Haridas, S., Kuo, A., Ohm, R., Otilar, R., Riley, R., Salamov, A.,  
490 Zhao, X., Korzeniewski, F., Smirnova, T., Nordberg, H., Dubchak, I., Shabalov, I., 2014.  
491 MycoCosm portal: gearing up for 1000 fungal genomes. *Nucleic Acids Research* 42,  
492 D699-D704.
- 493 Hawksworth, D.L., Lücking, R., 2017. Fungal Diversity Revisited: 2.2 to 3.8 Million Species.  
494 *The Fungal Kingdom*. American Society of Microbiology.
- 495 Hibbett, D.S., 2006. A phylogenetic overview of the Agaricomycotina. *Mycologia* 98, 917-925.
- 496 Hibbett, D.S., Bauer, R., Binder, M., Giachini, A.J., Hosaka, K., Justo, A., Larsson, E., Larsson,  
497 K.H., Lawrey, J.D., Miettinen, O., Nagy, L.G., Nilsson, R.H., Weiss, M., Thorn, R.G.,  
498 2014. 14 Agaricomycetes. In: McLaughlin, D.J., Spatafora, J.W. (Eds.), *Systematics and*  
499 *Evolution: Part A*. Springer Berlin Heidelberg, Berlin, Heidelberg, pp. 373-429.
- 500 Hibbett, D.S., Taylor, J.W., 2013. Fungal systematics: is a new age of enlightenment at hand?  
501 *Nat Rev Microbiol* 11, 129-133.
- 502 Jung, S.C., Martinez-Medina, A., Lopez-Raez, J.A., Pozo, M.J., 2012. Mycorrhiza-Induced  
503 Resistance and Priming of Plant Defenses. *Journal of Chemical Ecology* 38, 651-664.
- 504 Keller, O., Kollmar, M., Stanke, M., Waack, S., 2011. A novel hybrid gene prediction method  
505 employing protein multiple sequence alignments. *Bioinformatics* 27, 757-763.

- 506 Kirk, P.M., Ainsworth, G.C., Bisby, G.R., 2008. Ainsworth & Bisby's dictionary of the fungi.  
507 CABI.
- 508 Kohler, A., Kuo, A., Nagy, L.G., Morin, E., Barry, K.W., Buscot, F., Canback, B., Choi, C.,  
509 Cichocki, N., Clum, A., Colpaert, J., Copeland, A., Costa, M.D., Dore, J., Floudas, D.,  
510 Gay, G., Girlanda, M., Henrissat, B., Herrmann, S., Hess, J., Hogberg, N., Johansson, T.,  
511 Khouja, H.R., LaButti, K., Lahrmann, U., Lévassieur, A., Lindquist, E.A., Lipzen, A.,  
512 Marmeisse, R., Martino, E., Murat, C., Ngan, C.Y., Nehls, U., Plett, J.M., Pringle, A.,  
513 Ohm, R.A., Perotto, S., Peter, M., Riley, R., Rineau, F., Ruytinx, J., Salamov, A., Shah,  
514 F., Sun, H., Tarkka, M., Tritt, A., Veneault-Fourrey, C., Zuccaro, A., Mycorrhizal  
515 Genomics Initiative, C., Tunlid, A., Grigoriev, I.V., Hibbett, D.S., Martin, F., 2015.  
516 Convergent losses of decay mechanisms and rapid turnover of symbiosis genes in  
517 mycorrhizal mutualists. *Nat Genet* 47, 410-415.
- 518 Korf, I., 2004. Gene finding in novel genomes. *BMC Bioinformatics* 5, 59.
- 519 Kuga, Y., Sakamoto, N., Yurimoto, H., 2014. Stable isotope cellular imaging reveals that both  
520 live and degenerating fungal pelotons transfer carbon and nitrogen to orchid protocorms.  
521 *New Phytol* 202, 594-605.
- 522 Larsen, B.B., Miller, E.C., Rhodes, M.K., Wiens, J.J., 2017. Inordinate Fondness Multiplied and  
523 Redistributed: the Number of Species on Earth and the New Pie of Life. *The Quarterly*  
524 *Review of Biology* 92, 229-265.
- 525 Leacock, P.R., 2018. Cantharellales - MycoGuide.
- 526 Linde, C.C., May, T.W., Phillips, R.D., Ruibal, M., Smith, L.M., Peakall, R., 2017. New species  
527 of *Tulasnella* associated with terrestrial orchids in Australia. *IMA Fungus* 8, 28-47.
- 528 Lomsadze, A., Burns, P.D., Borodovsky, M., 2014. Integration of mapped RNA-Seq reads into  
529 automatic training of eukaryotic gene finding algorithm. *Nucleic Acids Research* 42,  
530 e119-e119.
- 531 Lowe, T.M., Eddy, S.R., 1997. tRNAscan-SE: A Program for Improved Detection of Transfer  
532 RNA Genes in Genomic Sequence. *Nucleic Acids Research* 25, 955-964.
- 533 Lutzoni, F., Nowak, M.D., Alfaro, M.E., Reeb, V., Miadlikowska, J., Krug, M., Arnold, A.E.,  
534 Lewis, L.A., Swofford, D.L., Hibbett, D., Hilu, K., James, T.Y., Quandt, D., Magallón,  
535 S., 2018. Contemporaneous radiations of fungi and plants linked to symbiosis. *Nature*  
536 *Communications* 9.
- 537 Martos, F., Munoz, F., Pailler, T., Kottke, I., Gonneau, C., Selosse, M.-A., 2012. The role of  
538 epiphytism in architecture and evolutionary constraint within mycorrhizal networks of  
539 tropical orchids. *Molecular Ecology* 21, 5098-5109.
- 540 McCormick, M.K., Taylor, D.L., Whigham, D.F., Burnett, R.K., 2016. Germination patterns in  
541 three terrestrial orchids relate to abundance of mycorrhizal fungi. *Journal of Ecology* 104,  
542 744-754.
- 543 Mirarab, S., Reaz, R., Bayzid, M.S., Zimmermann, T., Swenson, M.S., Warnow, T., 2014.  
544 ASTRAL: genome-scale coalescent-based species tree estimation. *Bioinformatics* 30,  
545 i541-i548.
- 546 Nagy, L.G., Riley, R., Tritt, A., Adam, C., Daum, C., Floudas, D., Sun, H., Yadav, J.S.,  
547 Pangilinan, J., Larsson, K.-H., Matsuura, K., Barry, K., Labutti, K., Kuo, R., Ohm, R.A.,  
548 Bhattacharya, S.S., Shirouzu, T., Yoshinaga, Y., Martin, F.M., Grigoriev, I.V., Hibbett,  
549 D.S., 2016. Comparative Genomics of Early-Diverging Mushroom-Forming Fungi  
550 Provides Insights into the Origins of Lignocellulose Decay Capabilities. *Molecular*  
551 *Biology and Evolution* 33, 959-970.

- 552 Nilsson, R.H., Hyde, K.D., Pawłowska, J., Ryberg, M., Tedersoo, L., Aas, A.B., Alias, S.A.,  
553 Alves, A., Anderson, C.L., Antonelli, A., Arnold, A.E., Bahnmann, B., Bahram, M.,  
554 Bengtsson-Palme, J., Berlin, A., Branco, S., Chomnunti, P., Dissanayake, A., Drenkhan,  
555 R., Friberg, H., Frøslev, T.G., Halwachs, B., Hartmann, M., Henricot, B., Jayawardena,  
556 R., Jumpponen, A., Kausarud, H., Koskela, S., Kulik, T., Liimatainen, K., Lindahl, B.D.,  
557 Lindner, D., Liu, J.-K., Maharachchikumbura, S., Manamgoda, D., Martinsson, S.,  
558 Neves, M.A., Niskanen, T., Nylinder, S., Pereira, O.L., Pinho, D.B., Porter, T.M.,  
559 Queloz, V., Riit, T., Sánchez-García, M., De Sousa, F., Stefańczyk, E., Tadych, M.,  
560 Takamatsu, S., Tian, Q., Udayanga, D., Unterseher, M., Wang, Z., Wikee, S., Yan, J.,  
561 Larsson, E., Larsson, K.-H., Kõljalg, U., Abarenkov, K., 2014. Improving ITS sequence  
562 data for identification of plant pathogenic fungi. *67*, 11-19.
- 563 Nilsson, R.H., Larsson, K.-H., Taylor, A.F S., Bengtsson-Palme, J., Jeppesen, T.S., Schigel, D.,  
564 Kennedy, P., Picard, K., Glöckner, F.O., Tedersoo, L., Saar, I., Kõljalg, U., Abarenkov,  
565 K., 2019. The UNITE database for molecular identification of fungi: handling dark taxa  
566 and parallel taxonomic classifications. *Nucleic Acids Research* 47, D259-D264.
- 567 Nurk, S., Bankevich, A., Antipov, D., Gurevich, A., Korobeynikov, A., Lapidus, A., Prjibelsky,  
568 A., Pyshkin, A., Sirotkin, A., Sirotkin, Y., Stepanauskas, R., McLean, J., Lasken, R.,  
569 Clingenpeel, S.R., Woyke, T., Tesler, G., Alekseyev, M.A., Pevzner, P.A., 2013.  
570 *Assembling Genomes and Mini-metagenomes from Highly Chimeric Reads*. Springer  
571 Berlin Heidelberg, Berlin, Heidelberg, pp. 158-170.
- 572 Oberwinkler, F., Riess, K., Bauer, R., Kirschner, R., Garnica, S., 2013a. Taxonomic re-  
573 evaluation of the *Ceratobasidium*-*Rhizoctonia* complex and *Rhizoctonia butinii*, a new  
574 species attacking spruce. *Mycological Progress* 12, 763-776.
- 575 Oberwinkler, F., Riess, K., Bauer, R., Selosse, M.-A., Weiß, M., Garnica, S., Zuccaro, A.,  
576 2013b. Enigmatic Sebacinales. *Mycological Progress* 12, 1-27.
- 577 Palmer, J., Stajich, J.E., 2018. Funannotate.
- 578 Peterson, R.L., Massicotte, H.B., 2004. Exploring structural definitions of mycorrhizas, with  
579 emphasis on nutrient-exchange interfaces. *Canadian Journal of Botany* 82, 1074-1088.
- 580 Rasmussen, H.N., Dixon, K.W., Jersakova, J., Tesitelova, T., 2015. Germination and seedling  
581 establishment in orchids: a complex of requirements. *Ann Bot* 116, 391-402.
- 582 Ray, P., Ishiga, T., Decker, S.R., Turner, G.B., Craven, K.D., 2015. A Novel Delivery System  
583 for the Root Symbiotic Fungus, *Sebacina vermifera*, and Consequent Biomass  
584 Enhancement of Low Lignin COMT Switchgrass Lines. *BioEnergy Research* 8, 922-933.
- 585 Ruibal, M.P., Peakall, R., Foret, S., Linde, C.C., 2014. Development of Phylogenetic Markers for  
586 *Sebacina* (Sebacinaceae) Mycorrhizal Fungi Associated with Australian Orchids.  
587 *Applications in Plant Sciences* 2, 1400015.
- 588 Ruibal, M.P., Peakall, R., Smith, L.M., Linde, C.C., 2013. Phylogenetic and microsatellite  
589 markers for *Tulasnella* (Tulasnellaceae) mycorrhizal fungi associated with Australian  
590 orchids. *Appl Plant Sci* 1.
- 591 Ruibal, M.P., Triponez, Y., Smith, L.M., Peakall, R., Linde, C.C., 2017. Population structure of  
592 an orchid mycorrhizal fungus with genus-wide specificity. *Scientific Reports* 7.
- 593 Simao, F.A., Waterhouse, R.M., Ioannidis, P., Kriventseva, E.V., Zdobnov, E.M., 2015.  
594 BUSCO: assessing genome assembly and annotation completeness with single-copy  
595 orthologs. *Bioinformatics* 31, 3210-3212.
- 596 Slater, G.S.C., Birney, E., 2005. Automated generation of heuristics for biological sequence  
597 comparison. *BMC Bioinformatics* 6, 31.

- 598 Smith, S.E., Read, D.J., 2008. Mycorrhizal symbiosis. Academic press.
- 599 Spatafora, J.W., Chang, Y., Benny, G.L., Lazarus, K., Smith, M.E., Berbee, M.L., Bonito, G.,  
600 Corradi, N., Grigoriev, I., Gryganskyi, A., James, T.Y., O'Donnell, K., Roberson, R.W.,  
601 Taylor, T.N., Uehling, J., Vilgalys, R., White, M.M., Stajich, J.E., 2016. A phylum-level  
602 phylogenetic classification of zygomycete fungi based on genome-scale data. *Mycologia*  
603 108, 1028-1046.
- 604 Stajich, J.E., 2019. Automatic Assembly For the Fungi.
- 605 Stamatakis, A., 2006. RAxML-VI-HPC: maximum likelihood-based phylogenetic analyses with  
606 thousands of taxa and mixed models. *Bioinformatics* 22, 2688-2690.
- 607 Stamatakis, A., Hoover, P., Rougemont, J., 2008. A Rapid Bootstrap Algorithm for the RAxML  
608 Web Servers. *Systematic Biology* 57, 758-771.
- 609 Stanke, M., Waack, S., 2003. Gene prediction with a hidden Markov model and a new intron  
610 submodel. *Bioinformatics* 19, ii215-ii225.
- 611 Taylor, D.L., McCormick, M.K., 2008. Internal transcribed spacer primers and sequences for  
612 improved characterization of basidiomycetous orchid mycorrhizas. *New Phytol* 177,  
613 1020-1033.
- 614 Testa, A.C., Hane, J.K., Ellwood, S.R., Oliver, R.P., 2015. CodingQuarry: highly accurate  
615 hidden Markov model gene prediction in fungal genomes using RNA-seq transcripts.  
616 *BMC Genomics* 16, 170.
- 617 Varma, A., Singh, A., Sudha, Sahay, N.S., Sharma, J., Roy, A., Kumari, M., Rana, D., Thakran,  
618 S., Deka, D., Bharti, K., Hurek, T., Bleichert, O., Rexer, K.H., Kost, G., Hahn, A., Maier,  
619 W., Walter, M., Strack, D., Kranner, I., 2001. *Piriformospora indica*: An Axenically  
620 Culturable Mycorrhiza-Like Endosymbiotic Fungus. In: Hock, B. (Ed.), *Fungal*  
621 *Associations*. Springer Berlin Heidelberg, Berlin, Heidelberg, pp. 125-150.
- 622 Veldre, V., Abarenkov, K., Bahram, M., Martos, F., Selosse, M.-A., Tamm, H., Kõljalg, U.,  
623 Tedersoo, L., 2013. Evolution of nutritional modes of Ceratobasidiaceae (Cantharellales,  
624 Basidiomycota) as revealed from publicly available ITS sequences. *Fungal Ecology* 6,  
625 256-268.
- 626 Wang, W., Shi, J., Xie, Q., Jiang, Y., Yu, N., Wang, E., 2017. Nutrient Exchange and Regulation  
627 in Arbuscular Mycorrhizal Symbiosis. *Molecular Plant* 10, 1147-1158.
- 628 Weiss, M., Waller, F., Zuccaro, A., Selosse, M.A., 2016. Sebaciniales - one thousand and one  
629 interactions with land plants. *New Phytol* 211, 20-40.
- 630 White, T.J., Bruns, T., Lee, S., Taylor, J., 1990. Amplification and direct sequencing of fungal  
631 ribosomal RNA genes for phylogenetics. *PCR protocols: a guide to methods and*  
632 *applications* 18, 315-322.
- 633 Whitehead, M.R., Catullo, R.A., Ruibal, M., Dixon, K.W., Peakall, R., Linde, C.C., 2017.  
634 Evaluating multilocus Bayesian species delimitation for discovery of cryptic mycorrhizal  
635 diversity. *Fungal Ecology* 26, 74-84.
- 636 Yoder, J.A., Imfeld, S.M., Heydinger, D.J., Hart, C.E., Collier, M.H., Gribbins, K.M., Zettler,  
637 L.W., 2010. Comparative water balance profiles of Orchidaceae seeds for epiphytic and  
638 terrestrial taxa endemic to North America. *Plant Ecology* 211, 7-17.
- 639 Zettler, L.W., Corey, L.L., 2018. *Orchid Mycorrhizal Fungi: Isolation and Identification*  
640 *Techniques*. *Orchid Propagation: From Laboratories to Greenhouses—Methods and*  
641 *Protocols*. Springer, pp. 27-59.
- 642 Zhang, C., Sayyari, E., Mirarab, S., 2017. ASTRAL-III: Increased Scalability and Impacts of  
643 Contracting Low Support Branches. Springer International Publishing, Cham, pp. 53-75.

644  
645



646  
647  
648  
649  
650  
651  
652  
653  
654  
655  
656  
657  
658  
659  
660  
661  
662  
663  
664  
665  
666  
667  
668  
669  
670  
671  
672  
673

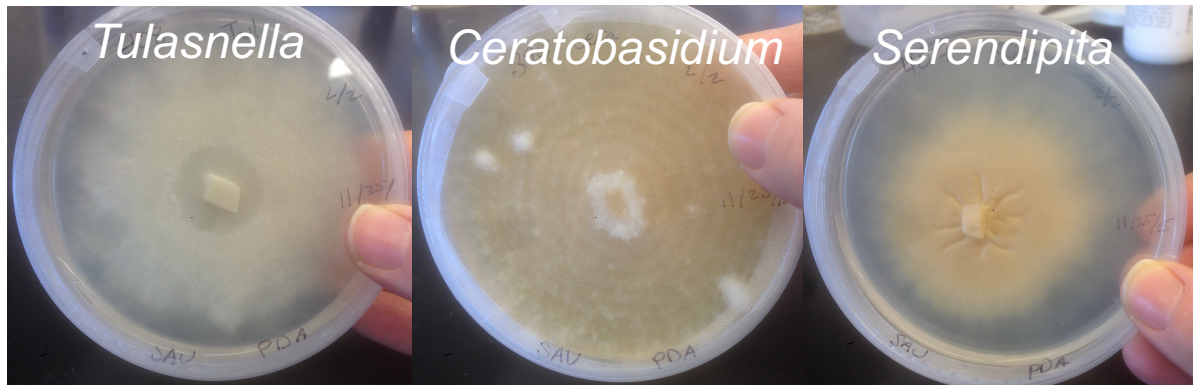

**Figure 1. Morphological examples of *Tulasnella*, *Ceratobasidium*, and *Serendipita*.** One representative from each genus from the Zettler collection. All three isolates started growing on Potato Dextrose Agar on the same day as indicated by the date on the petri dish (25 November 2015). Photographs: Sarah Unruh.

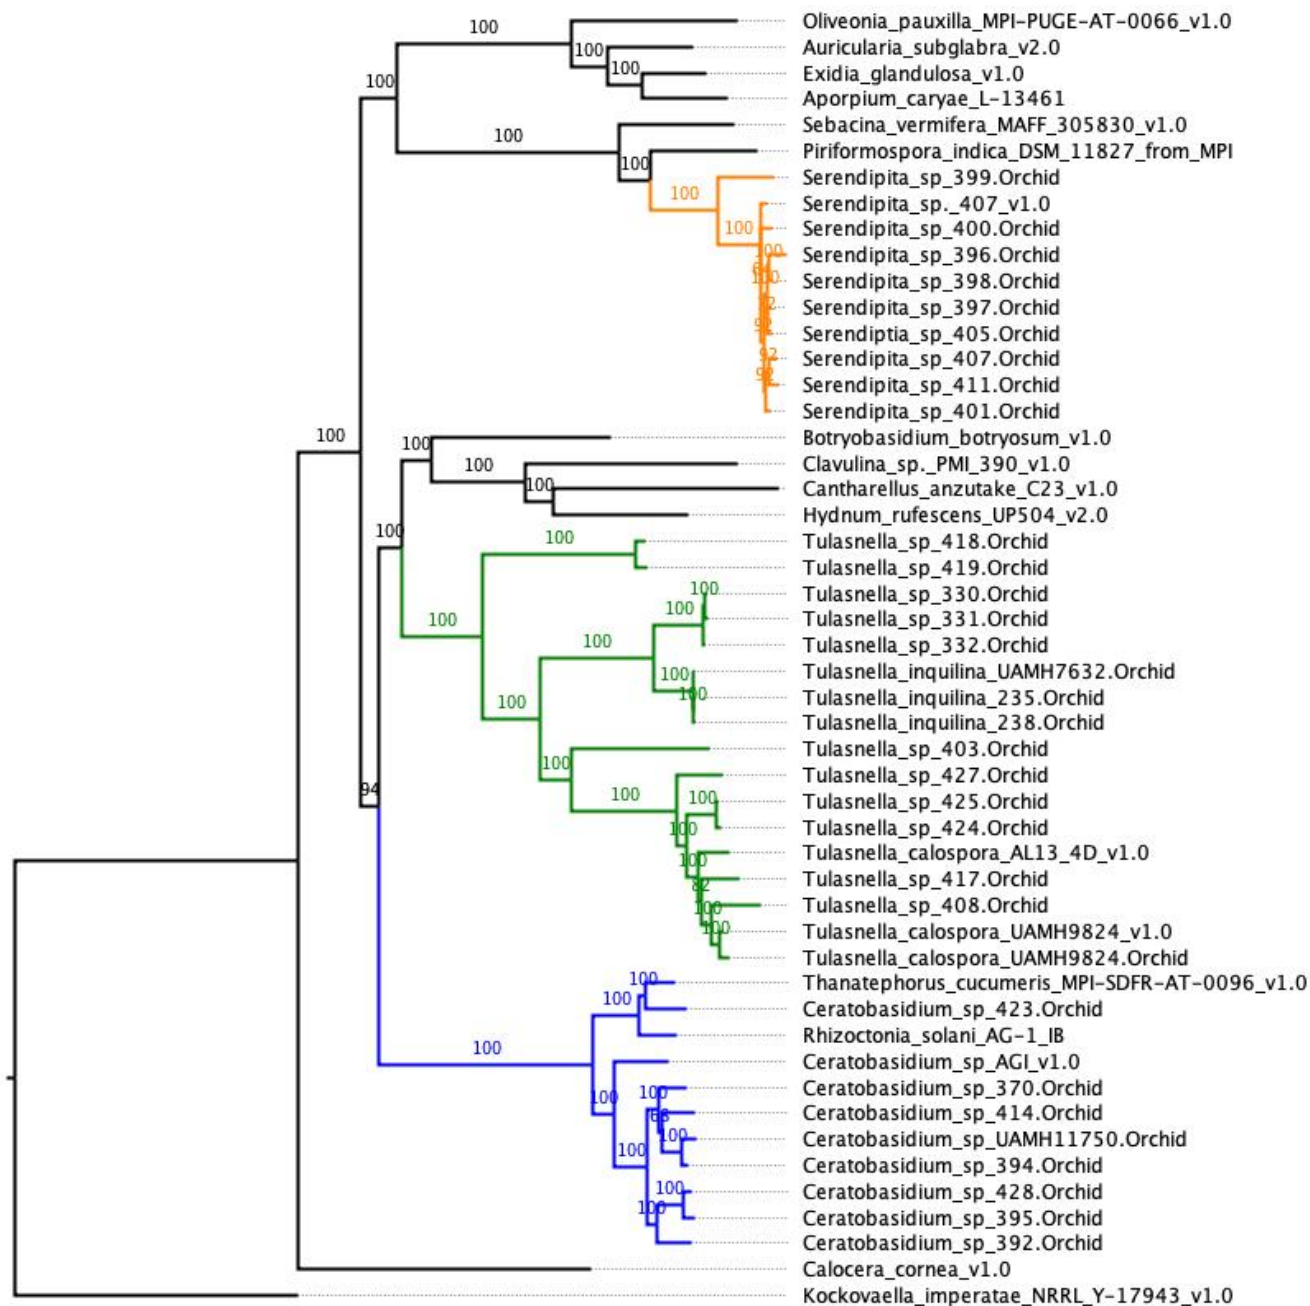

674  
675  
676  
677  
678  
679  
680  
681  
682  
683

**Figure 2. Concatenation-based phylogeny of orchid mycorrhizal fungi.**

Phylogenetic tree of the orchid mycorrhizal fungi in the Zettler collection with outgroups from the MycoCosm repository ([genome.jgi.doe.gov/mycocosm/home](http://genome.jgi.doe.gov/mycocosm/home)). Alignments were made with the Phyling pipeline and the phylogeny was built with RAxML.





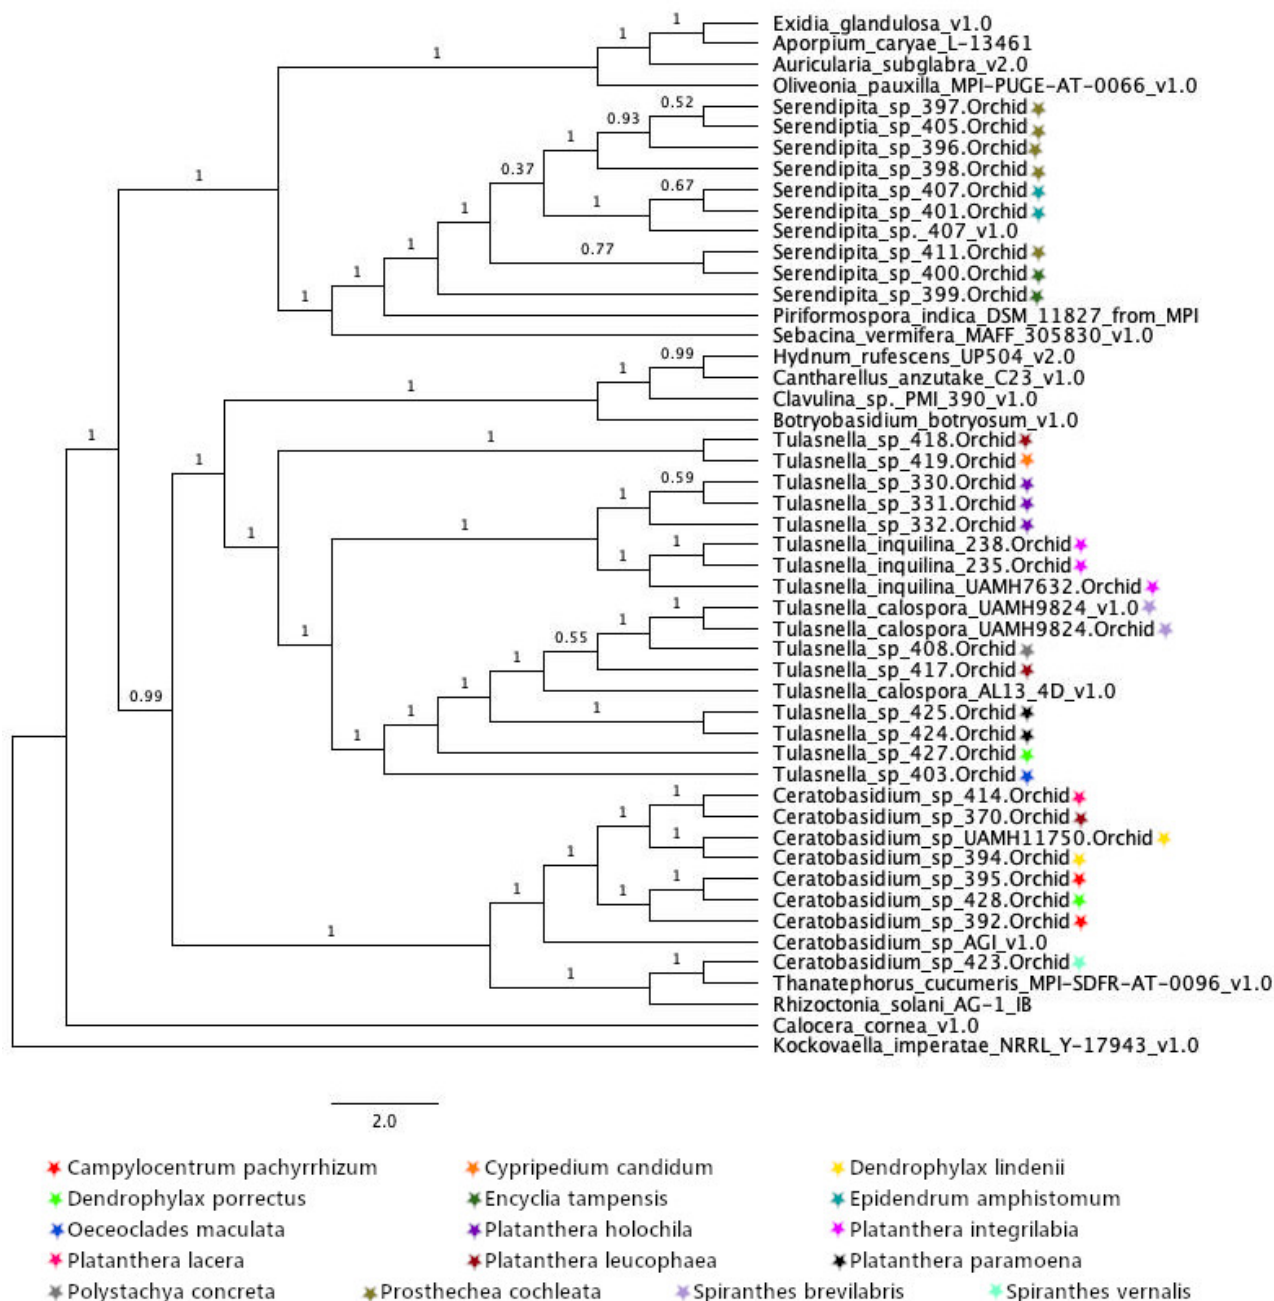

691  
692  
693  
694 **Figure 4. Annotated Quartet-based phylogeny.**  
695

696 Phylogenetic tree of the 32 orchid mycorrhizal fungi in the Zettler collection with 18  
697 genomes from the MycoCosm repository ([genome.jgi.doe.gov/mycocosm/home](http://genome.jgi.doe.gov/mycocosm/home)).  
698 Branches were transformed in FigTree and annotated with colored stars indicating the  
699 origin they were isolated from.  
700  
701

| Sample ID   | Species              | Strain    | Orchid source                                               | Tissue source      | Location                                       |
|-------------|----------------------|-----------|-------------------------------------------------------------|--------------------|------------------------------------------------|
| Cerato11750 | Ceratobasidium sp    | UAMH11750 | <i>Dendrophylax lindenii</i> (Lindl.) Benth. ex Rolfe       | root               | Florida Panther National Wildlife Refuge (NWR) |
| Cerato370   | Ceratobasidium sp    | 370       | <i>Platanthera leucophaea</i> (Nutt.) Lindl.                | root               | Tuscola Co., MI                                |
| Cerato392   | Ceratobasidium sp    | 392       | <i>Campylocentrum pachyrrhizum</i> (Rchb.f.) Rolfe          | root               | Florida Panther National Wildlife Refuge (NWR) |
| Cerato394   | Ceratobasidium sp    | 394       | <i>Dendrophylax lindenii</i> (Lindl.) Benth. ex Rolfe       | root               | Florida Panther National Wildlife Refuge (NWR) |
| Cerato395   | Ceratobasidium sp    | 395       | <i>Campylocentrum pachyrrhizum</i> (Rchb.f.) Rolfe          | root               | Florida Panther National Wildlife Refuge (NWR) |
| Cerato414   | Ceratobasidium sp    | 414       | <i>Platanthera lacera</i> (Michx.) G.Don                    | root               | Fayette Co., IL                                |
| Cerato423   | Ceratobasidium sp    | 423       | <i>Spiranthes vernalis</i> Engelm. & A.Gray                 | root               | Madison Co., IL                                |
| Cerato428   | Ceratobasidium sp    | 428       | <i>Dendrophylax porrectus</i> (Rchb.f.) Carlswald & Whitten | root               | Florida Panther National Wildlife Refuge (NWR) |
| Serend396   | Serendipita sp       | 396       | <i>Prosthechea cochleata</i> (L.) W.E.Higgins               | root               | Florida Panther National Wildlife Refuge (NWR) |
| Serend397   | Serendipita sp       | 397       | <i>Prosthechea cochleata</i> (L.) W.E.Higgins               | root               | Florida Panther National Wildlife Refuge (NWR) |
| Serend398   | Serendipita sp       | 398       | <i>Prosthechea cochleata</i> (L.) W.E.Higgins               | root               | Florida Panther National Wildlife Refuge (NWR) |
| Serend399   | Serendipita sp       | 399       | <i>Encyclia tampensis</i> Small                             | root               | Florida Panther National Wildlife Refuge (NWR) |
| Serend400   | Serendipita sp       | 400       | <i>Encyclia tampensis</i> Small                             | root               | Florida Panther National Wildlife Refuge (NWR) |
| Serend401   | Serendipita sp       | 401       | <i>Epidendrum amphistomum</i> A.Rich                        | root               | Florida Panther National Wildlife Refuge (NWR) |
| Serend405   | Serendipita sp       | 405       | <i>Prosthechea cochleata</i> (L.) W.E.Higgins               | root               | Florida Panther National Wildlife Refuge (NWR) |
| Serend407   | Serendipita sp       | 407       | <i>Epidendrum amphistomum</i> A.Rich                        | root               | Florida Panther National Wildlife Refuge (NWR) |
| Serend411   | Serendipita sp       | 411       | <i>Prosthechea cochleata</i> (L.) W.E.Higgins               | root               | Florida Panther National Wildlife Refuge (NWR) |
| Tulasn330   | Tulasnella sp        | 330       | <i>Platanthera holochila</i> (Hillebr.) Kraenzl.            | peloton            | Molokai, HI                                    |
| Tulasn331   | Tulasnella sp        | 331       | <i>Platanthera holochila</i> (Hillebr.) Kraenzl.            | peloton            | Molokai, HI                                    |
| Tulasn332   | Tulasnella sp        | 332       | <i>Platanthera holochila</i> (Hillebr.) Kraenzl.            | peloton            | Molokai, HI                                    |
| Tulasn403   | Tulasnella sp        | 403       | <i>Oeceoclades maculata</i> Lindl.                          | root               | Florida Panther National Wildlife Refuge (NWR) |
| Tulasn408   | Tulasnella sp        | 408       | <i>Polystachya concreta</i> (Jacq.) Garay & H.R.Sweet       | root               | Florida Panther National Wildlife Refuge (NWR) |
| Tulasn417   | Tulasnella sp        | 417       | <i>Platanthera leucophaea</i> (Nutt.) Lindl.                | root               | McHenry Co., IL                                |
| Tulasn418   | Tulasnella sp        | 418       | <i>Platanthera leucophaea</i> (Nutt.) Lindl.                | root               | McHenry Co., IL                                |
| Tulasn419   | Tulasnella sp        | 419       | <i>Cypripedium candidum</i> Muhl. ex Willd.                 | protocorm/seedling | McHenry Co., IL                                |
| Tulasn424   | Tulasnella sp        | 424       | <i>Platanthera paramoena</i> A.Gray                         | root               | Fayette Co., IL                                |
| Tulasn425   | Tulasnella sp        | 425       | <i>Platanthera paramoena</i> A.Gray                         | root               | Fayette Co., IL                                |
| Tulasn427   | Tulasnella sp        | 427       | <i>Dendrophylax porrectus</i> (Rchb.f.) Carlswald & Whitten | root               | Florida Panther National Wildlife Refuge (NWR) |
| Tulasn9824  | Tulasnella calospora | UAMH9824  | <i>Spiranthes brevilabris</i> Lindl.                        | root               | Levy Co., FL                                   |
| Tulinq235   | Tulasnella inquilina | 235       | <i>Platanthera integrilabia</i> (Correll) Luer              | root               | McMinn Co., TN                                 |
| Tulinq238   | Tulasnella inquilina | 238       | <i>Platanthera integrilabia</i> (Correll) Luer              | root               | McMinn Co., TN                                 |
| Tulinq7632  | Tulasnella inquilina | UAMH7632  | <i>Platanthera integrilabia</i> (Correll) Luer              | root               | Greenville, SC                                 |

**Table 1. Description of fungal isolates.**

UAMH numbers refer to the repository number for isolates deposited in the UAMH Centre for Global Microfungal Diversity

| SampleID    | Morphological ID      | Top hit UNITE                | Top hit GenBank                                                  | Primer sequenced | Length edited in base pairs |
|-------------|-----------------------|------------------------------|------------------------------------------------------------------|------------------|-----------------------------|
| Cerato11750 | <i>Ceratobasidium</i> | Ceratobasidiaceae            | Uncultured <i>Ceratobasidium</i> clone LP8-Cer1                  | ITS1             | 641                         |
| Cerato370   | <i>Ceratobasidium</i> | <i>Ceratobasidium</i>        | <i>Ceratobasidium</i> UAMH 9847                                  | ITS4             | 538                         |
| Cerato392   | <i>Ceratobasidium</i> | Basidiomycota (same as ncbi) | orchid mycorrhizae KH4-8                                         | ITS4             | 550                         |
| Cerato394   | <i>Ceratobasidium</i> | <i>Ceratobasidium</i>        | <i>Ceratobasidium</i>                                            | ITS1             | 586                         |
| Cerato395   | <i>Ceratobasidium</i> | Ceratobasidiaceae            | <i>Ceratobasidium</i> sp JTO161                                  | ITS1             | 548                         |
| Cerato414   | <i>Ceratobasidium</i> | Ceratobasidiaceae            | <i>Ceratobasidium</i> sp                                         | ITS1             | 100                         |
| Cerato423   | <i>Ceratobasidium</i> | <i>Ceratobasidium</i>        | Uncultured Ceratobasidiaceae clone 207                           | ITS4             | 390                         |
| Cerato428   | <i>Ceratobasidium</i> | Ceratobasidiaceae            | <i>Ceratobasidium</i> sp JTO161                                  | ITS1             | 420                         |
| Serend396   | <i>Serendipita</i>    | Sebacinales (orchid fungus)  | uncultured Sebacinales clone                                     | ITS1             | 189                         |
| Serend397   | <i>Serendipita</i>    | Sebacinales                  | uncultured Sebacinales clone                                     | NL4              | 680                         |
| Serend398   | <i>Serendipita</i>    | Sebacinales                  | uncultured Sebacinales clone                                     | NL4              | 567                         |
| Serend399   | <i>Serendipita</i>    | Sebacinales                  | uncultured Sebacinales clone                                     | NL4              | 740                         |
| Serend400   | <i>Serendipita</i>    | Sebacinales                  | <i>Serendipita</i> sp MAFF 305831                                | NL4              | 780                         |
| Serend401   | <i>Serendipita</i>    | Sebacinales                  | Uncultured Sebacinales clone LP49-23S                            | ITS4             | 614                         |
| Serend405   | <i>Serendipita</i>    | <i>Serendipita</i>           | <i>Serendipita</i> sp MAFF 305831                                | NL4              | 380                         |
| Serend407   | <i>Serendipita</i>    | Sebacinales                  | Uncultured <i>Sebacina</i> mycobiont of <i>Riccardia palmata</i> | *                | 2316                        |
| Serend411   | <i>Serendipita</i>    | Sebacinales                  | Uncultured Sebacinales clone LP49-23S                            | ITS3Seb          | 880                         |

|              |                             |                                |                                                |          |     |
|--------------|-----------------------------|--------------------------------|------------------------------------------------|----------|-----|
| Tulasn330    | <i>Tulasnella</i>           | Tulasnellaceae                 | Uncultured Tulasnellaceae isolate 55P-Leu13    | ITS4     | 570 |
| Tulasn331    | <i>Tulasnella</i>           | Tulasnellaceae                 | Uncultured Tulasnellaceae                      | ITS1     | 620 |
| Tulasn332    | <i>Tulasnella</i>           | Tulasnellaceae                 | Uncultured Tulasnellaceae                      | ITS4-OF  | 810 |
| Tulasn403    | <i>Tulasnella</i>           | <i>Tulasnella</i>              | <i>Tulasnella sp</i> CH01                      | ITS1     | 490 |
| Tulasn408    | <i>Tulasnella</i>           | Tulasnellaceae                 | Uncultured Tulasnellaceae clone DOF-YC9        | ITS4     | 622 |
| Tulasn417    | <i>Tulasnella</i>           | <i>Tulasnella</i>              | <i>Tulasnella sp</i> 9 MM-2012                 | ITS1     | 870 |
| Tulasn418    | <i>Tulasnella</i>           | Tulasnellaceae                 | Uncultured Tulasnellaceae P94                  | ITS1     | 350 |
| Tulasn419    | <i>Tulasnella</i>           | <i>Tulasnella</i>              | Tulasnellaceae sp Pch 253                      | ITS4     | 368 |
| Tulasn424    | <i>Tulasnella</i>           | Tulasnellaceae                 | Tulasnellaceae                                 | ITS4     | 605 |
| Tulasn425    | <i>Tulasnella</i>           | <i>Tulasnella</i>              | <i>Tulasnella sp</i> 149                       | ITS1     | 570 |
| Tulasn427    | <i>Tulasnella</i>           | Tulasnellaceae                 | Uncultured <i>Tulasnella</i> clone 998OF       | ITS4     | 380 |
| Tulasn9824   | <i>Tulasnella calospora</i> | <i>Tulasnella calospora</i>    | <i>Tulasnella calospora</i> isolate Pch-QS-0-1 | ITS4-Tul | 148 |
| Tulinq235    | <i>Epulorhiza inquilina</i> | <i>Tulasnella</i>              | <i>Tulasnella sp</i> 3MV-2011 PA 053A          | ITS4     | 650 |
| Tulinq238    | <i>Epulorhiza inquilina</i> | Tulasnellaceae                 | <i>Tulasnella sp</i> 3MV-2011 PA 053A          | ITS4     | 758 |
| Tulinq7632   | <i>Epulorhiza inquilina</i> | <i>Tulasnella</i>              | <i>Tulasnella sp</i> 3MV-2011 PA 053A          | ITS1     | 790 |
| Isolate 420* | <i>Tulasnella</i>           | <i>Phanerochaete australis</i> | <i>Phanerochaete australis</i>                 | ITS1     | 350 |
| Isolate 422* | <i>Tulasnella</i>           | <i>Trichoderma petersenii</i>  | <i>Trichoderma sp</i> isolate ARMI-23          | ITS4     | 390 |

**Table 2. Identifications of fungal isolates based on the internal transcribed spacer (ITS)**

| <b>SampleID</b>                                | <b>BioProject or JGI web portal</b> | <b>BioSample</b> |
|------------------------------------------------|-------------------------------------|------------------|
| * <i>Ceratobasidium_sp_UAMH11750</i> .Orchid   | PRJNA558776                         | SAMN12498506     |
| <i>Ceratobasidium_sp_370</i> .Orchid           | PRJNA557749                         | SAMN12427929     |
| <i>Ceratobasidium_sp_392</i> .Orchid           | PRJNA557750                         | SAMN12427914     |
| * <i>Ceratobasidium_sp_394</i> .Orchid         | PRJNA557751                         | SAMN12427897     |
| * <i>Ceratobasidium_sp_395</i> .Orchid         | PRJNA557752                         | SAMN12427926     |
| <i>Ceratobasidium_sp_414</i> .Orchid           | PRJNA557753                         | SAMN12427925     |
| * <i>Ceratobasidium_sp_423</i> .Orchid         | PRJNA557754                         | SAMN12427910     |
| <i>Ceratobasidium_sp_428</i> .Orchid           | PRJNA557755                         | SAMN12427923     |
| <i>Serendipita_sp_396</i> .Orchid              | PRJNA557757                         | SAMN12427894     |
| <i>Serendipita_sp_397</i> .Orchid              | PRJNA557758                         | SAMN12427928     |
| <i>Serendipita_sp_398</i> .Orchid              | PRJNA557759                         | SAMN12427900     |
| <i>Serendipita_sp_399</i> .Orchid              | PRJNA557760                         | SAMN12427906     |
| * <i>Serendipita_sp_400</i> .Orchid            | PRJNA557761                         | SAMN12427895     |
| <i>Serendipita_sp_401</i> .Orchid              | PRJNA557762                         | SAMN12427903     |
| * <i>Serendipita_sp_405</i> .Orchid            | PRJNA557763                         | SAMN12427917     |
| * <i>Serendipita_sp_407</i> .Orchid            | PRJNA558790                         | SAMN12498938     |
| * <i>Serendipita_sp_411</i> .Orchid            | PRJNA557734                         | SAMN12427911     |
| <i>Tulasnella_sp_330</i> .Orchid               | PRJNA557739                         | SAMN12427924     |
| <i>Tulasnella_sp_331</i> .Orchid               | PRJNA557740                         | SAMN12427908     |
| * <i>Tulasnella_sp_332</i> .Orchid             | PRJNA557741                         | SAMN12427902     |
| <i>Tulasnella_sp_403</i> .Orchid               | PRJNA557742                         | SAMN12427920     |
| <i>Tulasnella_sp_408</i> .Orchid               | PRJNA557743                         | SAMN12427916     |
| <i>Tulasnella_sp_417</i> .Orchid               | PRJNA557744                         | SAMN12427919     |
| <i>Tulasnella_sp_418</i> .Orchid               | PRJNA557745                         | SAMN12427921     |
| * <i>Tulasnella_sp_419</i> .Orchid             | PRJNA557746                         | SAMN12427922     |
| <i>Tulasnella_sp_424</i> .Orchid               | PRJNA557747                         | SAMN12427899     |
| * <i>Tulasnella_sp_425</i> .Orchid             | PRJNA557748                         | SAMN12427912     |
| * <i>Tulasnella_sp_427</i> .Orchid             | PRJNA557733                         | SAMN12427904     |
| * <i>Tulasnella_calospora_UAMH9824</i> .Orchid | PRJNA558788                         | SAMN12498837     |
| <i>Tulasnella_inquilina_235</i> .Orchid        | PRJNA557736                         | SAMN12427891     |

|                                                      |                                                                                             |              |
|------------------------------------------------------|---------------------------------------------------------------------------------------------|--------------|
| * <i>Tulasnella_inquilina_238</i> .Orchid            | PRJNA557737                                                                                 | SAMN12427893 |
| * <i>Tulasnella_inquilina_UAMH7632</i> .Orchid       | PRJNA557738                                                                                 | SAMN12427890 |
| <i>Aporpium_caryae_L-13461</i> .                     | <a href="https://mycocosm.jgi.doe.gov/Elmca1">https://mycocosm.jgi.doe.gov/Elmca1</a>       |              |
| <i>Auricularia_subglabra_v2.0</i>                    | <a href="https://mycocosm.jgi.doe.gov/Aurde3_1">https://mycocosm.jgi.doe.gov/Aurde3_1</a>   |              |
| <i>Botryobasidium_botryosum_v1.0</i>                 | <a href="https://mycocosm.jgi.doe.gov/Botbo1">https://mycocosm.jgi.doe.gov/Botbo1</a>       |              |
| <i>Calocera_cornea_v1.0</i>                          | <a href="https://mycocosm.jgi.doe.gov/Calco1">https://mycocosm.jgi.doe.gov/Calco1</a>       |              |
| <i>Cantharellus_anzutake_C23_v1.0</i>                | <a href="https://mycocosm.jgi.doe.gov/Cananz1">https://mycocosm.jgi.doe.gov/Cananz1</a>     |              |
| <i>Clavulina_sp._PMI_390_v1.0</i>                    | <a href="https://mycocosm.jgi.doe.gov/ClaPMI390">https://mycocosm.jgi.doe.gov/ClaPMI390</a> |              |
| <i>Exidia_glandulosa_v1.0</i>                        | <a href="https://mycocosm.jgi.doe.gov/Exigl1">https://mycocosm.jgi.doe.gov/Exigl1</a>       |              |
| <i>Hydnum_rufescens_UP504_v2.0</i>                   | <a href="https://mycocosm.jgi.doe.gov/Hydru2">https://mycocosm.jgi.doe.gov/Hydru2</a>       |              |
| <i>Kockovaella_imperatae_NRRL_Y-17943_v1.0</i>       | <a href="https://mycocosm.jgi.doe.gov/Kocim1">https://mycocosm.jgi.doe.gov/Kocim1</a>       |              |
| <i>Oliveonia_pauxilla_MPI-PUGE-AT-0066_v1.0</i>      | <a href="https://mycocosm.jgi.doe.gov/Olipa1">https://mycocosm.jgi.doe.gov/Olipa1</a>       |              |
| <i>Piriformospora_indica_DSM_11827_from_MPI</i>      | <a href="https://mycocosm.jgi.doe.gov/Pirin1">https://mycocosm.jgi.doe.gov/Pirin1</a>       |              |
| <i>Rhizoctonia_solani_AG-1_IB</i>                    | <a href="https://mycocosm.jgi.doe.gov/Rhiso1">https://mycocosm.jgi.doe.gov/Rhiso1</a>       |              |
| <i>Sebacina_vermifera_MAFF_305830_v1.0</i>           | <a href="https://mycocosm.jgi.doe.gov/Sebve1">https://mycocosm.jgi.doe.gov/Sebve1</a>       |              |
| <i>Serendipita_sp._407_v1.0</i>                      | <a href="https://mycocosm.jgi.doe.gov/Serend1">https://mycocosm.jgi.doe.gov/Serend1</a>     |              |
| <i>Thanatephorus_cucumeris_MPI-SDFR-AT-0096_v1.0</i> | <a href="https://mycocosm.jgi.doe.gov/Thacu1">https://mycocosm.jgi.doe.gov/Thacu1</a>       |              |
| <i>Tulasnella_calospora_AL13_4D_v1.0</i>             | <a href="https://mycocosm.jgi.doe.gov/Tulca1">https://mycocosm.jgi.doe.gov/Tulca1</a>       |              |

**Table 3. List of taxa and data availability.**

Asterisks \* indicate isolates selected for reference genome sequencing.

| SampleID                           | CONTIG<br>COUNT | TOTAL LENGTH | MIN  | MAX    | MEDIAN | MEAN     | L50  | N50    | L90   | N90   |
|------------------------------------|-----------------|--------------|------|--------|--------|----------|------|--------|-------|-------|
| Ceratobasidium_sp_UAMH11750.Orchid | 7239            | 47766782     | 2000 | 131072 | 4320   | 6598.53  | 1452 | 8784   | 5266  | 2947  |
| Ceratobasidium_sp_370.Orchid       | 8028            | 47284605     | 2000 | 145775 | 3838   | 5889.96  | 1613 | 7304   | 5991  | 2715  |
| Ceratobasidium_sp_392.Orchid       | 8904            | 52465834     | 1500 | 100768 | 3806   | 5892.39  | 1693 | 8316   | 6228  | 2516  |
| Ceratobasidium_sp_394.Orchid       | 8562            | 53454716     | 1500 | 94250  | 3864   | 6243.25  | 1547 | 9440   | 5859  | 2601  |
| Ceratobasidium_sp_395.Orchid       | 8769            | 67010313     | 1500 | 125675 | 4575   | 7641.73  | 1478 | 12298  | 5716  | 3127  |
| Ceratobasidium_sp_414.Orchid       | 4161            | 50425407     | 1500 | 342430 | 4339   | 12118.58 | 349  | 34639  | 2143  | 4179  |
| Ceratobasidium_sp_423.Orchid       | 15380           | 66434938     | 1500 | 107431 | 2946   | 4319.57  | 3306 | 5259   | 11578 | 2042  |
| Ceratobasidium_sp_428.Orchid       | 8999            | 69097995     | 1500 | 121965 | 4552   | 7678.41  | 1493 | 12317  | 5876  | 3139  |
| Serendipita_sp_396.Orchid          | 1431            | 20638744     | 2072 | 267195 | 9279   | 14422.6  | 279  | 17663  | 1083  | 6736  |
| Serendipita_sp_397.Orchid          | 4253            | 28775535     | 1500 | 270096 | 3582   | 6765.94  | 580  | 10829  | 2793  | 2618  |
| Serendipita_sp_398.Orchid          | 4302            | 28851264     | 1500 | 267525 | 3546   | 6706.48  | 574  | 11054  | 2835  | 2583  |
| Serendipita_sp_399.Orchid          | 5013            | 31004825     | 1500 | 127831 | 3844   | 6184.88  | 906  | 8927   | 3450  | 2622  |
| Serendipita_sp_400.Orchid          | 4392            | 28560853     | 1502 | 143991 | 3564   | 6502.93  | 635  | 10584  | 2927  | 2562  |
| Serendipita_sp_401.Orchid          | 3823            | 28571286     | 1500 | 662216 | 3626   | 7473.52  | 429  | 13497  | 2433  | 2804  |
| Serendipita_sp_405.Orchid          | 4254            | 28724145     | 1500 | 280457 | 3539   | 6752.27  | 566  | 10892  | 2796  | 2594  |
| Serendipita_sp_407.Orchid          | 4028            | 27230538     | 1500 | 297010 | 3154   | 6760.31  | 426  | 12923  | 2590  | 2442  |
| Serendipita_sp_411.Orchid          | 4211            | 28400685     | 1500 | 296955 | 3574   | 6744.4   | 574  | 10730  | 2767  | 2605  |
| Tulasnella_sp_330.Orchid           | 1013            | 42302809     | 1500 | 967722 | 8117   | 41759.93 | 66   | 175815 | 323   | 19296 |
| Tulasnella_sp_331.Orchid           | 3446            | 44512311     | 1500 | 298887 | 4965   | 12917.1  | 311  | 35916  | 1764  | 4762  |
| Tulasnella_sp_332.Orchid           | 3329            | 44576393     | 1501 | 416704 | 5260   | 13390.33 | 297  | 36313  | 1699  | 5096  |

|                                      |       |          |      |         |       |          |      |        |      |       |
|--------------------------------------|-------|----------|------|---------|-------|----------|------|--------|------|-------|
| Tulasnella_sp_403.Orchid             | 2963  | 29964626 | 1502 | 501591  | 4201  | 10112.93 | 303  | 23340  | 1647 | 3550  |
| Tulasnella_sp_408.Orchid             | 10591 | 63626598 | 1500 | 92931   | 3595  | 6007.61  | 1850 | 9042   | 7284 | 2490  |
| Tulasnella_sp_417.Orchid             | 9866  | 61487333 | 1500 | 224139  | 3694  | 6232.25  | 1709 | 9469   | 6703 | 2528  |
| Tulasnella_sp_418.Orchid             | 3880  | 32841821 | 1501 | 268652  | 3496  | 8464.39  | 411  | 18771  | 2277 | 2844  |
| Tulasnella_sp_419.Orchid             | 3865  | 33665047 | 1500 | 229676  | 3923  | 8710.23  | 419  | 18466  | 2308 | 3120  |
| Tulasnella_sp_424.Orchid             | 781   | 48431701 | 1507 | 1054277 | 13975 | 62012.42 | 71   | 195410 | 275  | 36329 |
| Tulasnella_sp_425.Orchid             | 769   | 48399368 | 1507 | 1089567 | 16223 | 62938.06 | 74   | 189857 | 290  | 37534 |
| Tulasnella_sp_427.Orchid             | 6018  | 39289859 | 1500 | 134256  | 3802  | 6528.72  | 956  | 9789   | 4051 | 2663  |
| Tulasnella_calospora_UAMH9824.Orchid | 4164  | 49802335 | 1500 | 345740  | 5668  | 11960.21 | 481  | 25557  | 2334 | 4747  |
| Tulasnella_inquilina_235.Orchid      | 1742  | 44191844 | 1503 | 570014  | 3948  | 25368.45 | 119  | 102565 | 508  | 11931 |
| Tulasnella_inquilina_238.Orchid      | 2874  | 45488573 | 1500 | 444022  | 4355  | 15827.62 | 240  | 54071  | 1242 | 5477  |
| Tulasnella_inquilina_UAMH7632.Orchid | 2898  | 46174977 | 1501 | 520136  | 4010  | 15933.39 | 209  | 56439  | 1211 | 5431  |

**Table 4. Assembly statistics.**



| SampleID                           | RNASeq    | Gene Count | BUSCO Complete % | BUSCO Single | BUSCO Fragmented | BUSCO Missing | BUSCO # Genes |
|------------------------------------|-----------|------------|------------------|--------------|------------------|---------------|---------------|
| Ceratobasidium_sp_UAMH11750.Orchid | Cerato379 | 16971      | 65.8             | 60.3         | 11.6             | 22.6          | 1335          |
| Ceratobasidium_sp_370.Orchid       | CeratoAll | 11343      | 78.4             | 77.7         | 8.5              | 13.1          | 1335          |
| Ceratobasidium_sp_392.Orchid       | CeratoAll | 14816      | 72.3             | 66.3         | 13.4             | 14.3          | 1335          |
| Ceratobasidium_sp_394.Orchid       | Cerato394 | 18818      | 71.1             | 62.6         | 13.6             | 15.3          | 1335          |
| Ceratobasidium_sp_395.Orchid       | Cerato395 | 19777      | 71.1             | 42.9         | 13.2             | 15.7          | 1335          |
| Ceratobasidium_sp_414.Orchid       | CeratoAll | 12172      | 96.6             | 95.5         | 1.6              | 1.8           | 1335          |
| Ceratobasidium_sp_423.Orchid       | CeratoAll | 13213      | 77.6             | 76.6         | 11.7             | 10.7          | 1335          |
| Ceratobasidium_sp_428.Orchid       | CeratoAll | 25061      | 71.4             | 39.4         | 11.9             | 16.7          | 1335          |
| Serendipita_sp_396.Orchid          | Serend400 | 8272       | 65.5             | 64.9         | 5.8              | 28.7          | 1335          |
| Serendipita_sp_397.Orchid          | Serend400 | 12078      | 74.7             | 73.8         | 11.9             | 13.4          | 1335          |
| Serendipita_sp_398.Orchid          | Serend400 | 12311      | 74.6             | 73.6         | 11.4             | 14            | 1335          |
| Serendipita_sp_399.Orchid          | Serend400 | 11252      | 72.2             | 64.6         | 11.6             | 16.2          | 1335          |
| Serendipita_sp_400.Orchid          | Serend400 | 12369      | 72               | 70.9         | 11.3             | 16.7          | 1335          |
| Serendipita_sp_401.Orchid          | Serend400 | 11951      | 76.4             | 75.4         | 10               | 13.6          | 1335          |
| Serendipita_sp_405.Orchid          | Serend400 | 11992      | 73.3             | 72.6         | 10.7             | 16            | 1335          |
| Serendipita_sp_407.Orchid          | Serend400 | 11442      | 69               | 67.8         | 13.3             | 17.7          | 1335          |
| Serendipita_sp_411.Orchid          | Serend400 | 11996      | 74.5             | 73.2         | 10.6             | 14.9          | 1335          |
| Tulasnella_sp_330.Orchid           |           | 9146       | 95.4             | 94.5         | 1.8              | 2.8           | 1335          |
| Tulasnella_sp_331.Orchid           |           | 9039       | 92.9             | 91.7         | 2.8              | 4.3           | 1335          |
| Tulasnella_sp_332.Orchid           |           | 9025       | 93               | 91.7         | 2.7              | 4.3           | 1335          |

|                                      |            |       |      |      |      |      |      |
|--------------------------------------|------------|-------|------|------|------|------|------|
| Tulasnella_sp_403.Orchid             | Tulinq7632 | 8272  | 77.7 | 77.2 | 10.3 | 12   | 1335 |
| Tulasnella_sp_408.Orchid             | Tulinq7632 | 15407 | 54.2 | 48.4 | 17.5 | 28.3 | 1335 |
| Tulasnella_sp_417.Orchid             |            | 13362 | 62.4 | 56.7 | 15.3 | 22.3 | 1335 |
| Tulasnella_sp_418.Orchid             | Tulasn419  | 12415 | 86.3 | 85.5 | 6.1  | 7.6  | 1335 |
| Tulasnella_sp_419.Orchid             | Tulasn419  | 12897 | 88   | 87.3 | 6    | 6    | 1335 |
| Tulasnella_sp_424.Orchid             |            | 11832 | 95.6 | 94.3 | 1.6  | 2.8  | 1335 |
| Tulasnella_sp_425.Orchid             |            | 10834 | 96   | 94.4 | 1.4  | 2.6  | 1335 |
| Tulasnella_sp_427.Orchid             |            | 11876 | 71.4 | 62   | 14.6 | 14   | 1335 |
| Tulasnella_calospora_UAMH9824.Orchid | Tulinq7632 | 12307 | 88.9 | 87.3 | 5.4  | 5.7  | 1335 |
| Tulasnella_inquilina_235.Orchid      | Tulinq7632 | 13948 | 95.4 | 94.3 | 1.9  | 2.7  | 1335 |
| Tulasnella_inquilina_238.Orchid      | Tulinq7632 | 14664 | 94.1 | 92.5 | 2.6  | 3.3  | 1335 |
| Tulasnella_inquilina_UAMH7632.Orchid | Tulinq7632 | 14741 | 94.2 | 92.5 | 2.3  | 3.5  | 1335 |

**Table 5. Annotation and BUSCO completeness metrics.**

Taxa without an RNA sequence listed did not sufficiently map to the Tulinq7632 RNA sequences and were annotated without expression data. The colors in the BUSCO complete % column range from blue-green (lowest percentage) to dark red (highest percentage).

| <b>Sample ID</b>                     | <b>Number best hit genes (429 total)</b> |
|--------------------------------------|------------------------------------------|
| Ceratobasidium_sp_UAMH11750.Orchid   | 354                                      |
| Ceratobasidium_sp_370.Orchid         | 356                                      |
| Ceratobasidium_sp_392.Orchid         | 368                                      |
| Ceratobasidium_sp_394.Orchid         | 376                                      |
| Ceratobasidium_sp_395.Orchid         | 369                                      |
| Ceratobasidium_sp_414.Orchid         | 387                                      |
| Ceratobasidium_sp_423.Orchid         | 376                                      |
| Ceratobasidium_sp_428.Orchid         | 382                                      |
| Serendipita_sp_396.Orchid            | 311                                      |
| Serendipita_sp_397.Orchid            | 391                                      |
| Serendipita_sp_398.Orchid            | 371                                      |
| Serendipita_sp_399.Orchid            | 358                                      |
| Serendipita_sp_400.Orchid            | 375                                      |
| Serendipita_sp_401.Orchid            | 382                                      |
| Serendipita_sp_405.Orchid            | 379                                      |
| Serendipita_sp_407.Orchid            | 364                                      |
| Serendipita_sp_411.Orchid            | 382                                      |
| 39 Tulasnella_sp_330.Orchid          | 401                                      |
| Tulasnella_sp_331.Orchid             | 401                                      |
| Tulasnella_sp_332.Orchid             | 398                                      |
| Tulasnella_sp_403.Orchid             | 376                                      |
| Tulasnella_sp_408.Orchid             | 291                                      |
| Tulasnella_sp_417.Orchid             | 330                                      |
| Tulasnella_sp_418.Orchid             | 400                                      |
| Tulasnella_sp_419.Orchid             | 408                                      |
| Tulasnella_sp_424.Orchid             | 408                                      |
| Tulasnella_sp_425.Orchid             | 403                                      |
| Tulasnella_sp_427.Orchid             | 376                                      |
| Tulasnella_calospora_UAMH9824.Orchid | 398                                      |
| Tulasnella_inquilina_235.Orchid      | 416                                      |
| Tulasnella_inquilina_238.Orchid      | 410                                      |
| Tulasnella_inquilina_UAMH7632.Orchid | 417                                      |
| Aporpium_caryae_L-13461.             | 423                                      |
| Auricularia_subglabra_v2.0           | 425                                      |
| Botryobasidium_botryosum_v1.0        | 425                                      |
| Calocera_cornea_v1.0                 | 410                                      |
| Cantharellus_anzutake_C23_v1.0       | 412                                      |
| Ceratobasidium_sp_AGI_v1.0           | 422                                      |

|                                               |     |
|-----------------------------------------------|-----|
| Clavulina_sp._PMI_390_v1.0                    | 423 |
| Exidia_glandulosa_v1.0                        | 422 |
| Hydnum_rufescens_UP504_v2.0                   | 413 |
| Kockovaella_imperatae_NRRL_Y-17943_v1.0       | 408 |
| Oliveonia_pauxilla_MPI-PUGE-AT-0066_v1.0      | 419 |
| Piriformospora_indica_DSM_11827_from_MPI      | 417 |
| Rhizoctonia_solani_AG-1_IB                    | 410 |
| Sebacina_vermifera_MAFF_305830_v1.0           | 420 |
| Serendipita_sp._407_v1.0                      | 415 |
| Thanatephorus_cucumeris_MPI-SDFR-AT-0096_v1.0 | 424 |
| Tulasnella_calospora_AL13_4D_v1.0             | 405 |
| Tulasnella_calospora_UAMH9824_v1.0            | 426 |

**Table 6. Matrix Occupany.**

## Stajich lab CTAB Protocol:

### Reagents required:

BUFFER A: 0.35 M sorbitol 0.1 M Tris-HCl, pH 9 5 mM EDTA, pH 8  
BUFFER B: 0.2 M Tris-HCl, pH 9 50 mM EDTA, pH 8 2 M NaCl 2% CTAB  
BUFFER C: 5% Sarkosyl (N-lauroylsarcosine sodium salt SIGMA L5125)  
Potassium Acetate 5M (KAc precipitate polysaccharides) pH 7.5  
RNase A (10 mg/ml) Proteinase K (20 mg/ml)  
PVP 1 %  
(PCI) Phenol:Chloroform:Isoamyl alcohol (25:24:1)  
(CI) Chloroform:Isoamyl alcohol (24:1)  
Sodium Acetate (NaAc) 3M  
Isopropanol 100%  
Ethanol 70%

1. Add Lysis Buffer (650  $\mu$ L Buffer A, 650  $\mu$ L Buffer B, 260  $\mu$ L Buffer C, 175  $\mu$ L .1% PVP, 10  $\mu$ L Proteinase K) to 2 mL microcentrifuge tube, mix, and split equally into two 2 mL tubes.
2. Place in hot plate and heat to 65° C.
3. Grind young fungal tissue in liquid nitrogen, add 50-100 mg of tissue to each tube.
4. Incubate 30 min at 65° mixing by inversion frequently (2-5 min).
5. Add 280  $\mu$ L KAc to each tube, mix by inversion, incubate on ice for 5 min.
6. Add 500-700 (the more the better)  $\mu$ L PCI, mix by inversion (>5 min) or vortex briefly then incubate for 2 min at room temp (RT).
7. Spin at 6,000 g for 10 min
8. Take supernatant, add equal volume CI (usually about 1000ul).
9. Mix by inversion (>5 min) then incubate for 2 min.
10. Spin at 6,000 g for 10 min
11. Take supernatant (usually 700uL):
  - a. RNase treatment (2.5  $\mu$ L RNase, 37°, 90-120 min)\*
  - b. Optional additional CI washes
12. Add 1/10 vol NaAc, mix, add 1 vol Isopropanol.
13. Incubate at RT 5 min, should start to see lots of DNA threads.
14. Spin at 3,000 g for 2 min, pour out the supernatant.
15. Wash with 1 mL freshly prepared, cold 70% ethanol.
16. Spin at 3,000 g for 2 min, pipette out the EtOH. Remove as much EtOH as possible before drying.
17. Dry pellet at RT for 10-15 min and/or 65° for <2 min to dry any leftover ethanol
  - a. Resuspend in 50-100  $\mu$ L TE (adjusted to pH9) at 65° Optional CI wash (add 600-800 TE buffer at 65°, resuspend DNA, add equal volume CI, mix as directed in step 9, carry on protocol from there minus the RNase and CI steps, I usually take 500-600 supernatant if added 800 uL CI).
18. Nanodrop, 260/280 is indicative of nucleic acid and 260/230 indicative of protein
19. Qubit
20. Run on Gel
21. Check ITS and 16S by PCR

## Supplemental Figure S1. CTAB DNA extraction protocol from Stajich lab
